# 1           Uncovering the Structure and Function of Microbial 2           Communities Formed During Periodic Tilling of TNT and 3           DNT Co-Contaminated Soils

## 4   **Authors**

5   Saeed Keshani-Langroodi<sup>a</sup>, Yemin Lan<sup>b</sup>, Ben Stenuit<sup>c</sup>, Gail Rosen<sup>d</sup>, Joseph B. Hughes<sup>a</sup>, Lisa  
6   Alvarez-Cohen<sup>e,f</sup>, and Christopher M. Sales<sup>a\*</sup>

## 7   **Affiliations**

8   <sup>a</sup> Civil, Architectural, and Environmental Engineering, Drexel University, 3141 Chestnut Street,  
9   Philadelphia, Pennsylvania 19104, United States of America

10   <sup>b</sup> Epigenetics Institute, Department of Cell and Developmental Biology, 9th Floor, Smilow  
11   Center for Translational Research, 3400 Civic Center Blvd, Philadelphia, Pennsylvania 19104,  
12   United States of America

13   <sup>c</sup> Polytech Montpellier, University of Montpellier, Joint Research Unit of Agropolymer  
14   Engineering and Emerging Technologies (IATE, UMR 1208), CC023- Place Eugène Bataillon  
15   34095, Montpellier Cedex 5, France

16   <sup>d</sup> Electrical and Computer Engineering, Drexel University, 3141 Chestnut Street, Philadelphia,  
17   Pennsylvania 19104, United States of America

18   <sup>e</sup> Department of Civil and Environmental Engineering, University of California, Berkeley,  
19   California 94720, United States of America

20   <sup>f</sup> Earth and Environmental Sciences Division, Lawrence Berkeley National Laboratory, Berkeley,  
21   California 94720, USA.

22   \* Corresponding Author. E-mail: [chris.sales@drexel.edu](mailto:chris.sales@drexel.edu). Phone: (215) 895-2155. Fax: (215)-  
23   895-1363

## 24   **Corresponding Author**

25   Christopher M. Sales

26   Civil, Architectural, and Environmental Engineering

27   Drexel University

28   [chris.sales@drexel.edu](mailto:chris.sales@drexel.edu)

29   Phone: (215) 895-2155

30   Fax: (215)-895-1363

## 35 **1. Abstract**

36 Environmental contamination by 2,4,6-trinitrotoluene (TNT), historically the most widely used  
37 secondary explosive, is a long-standing problem in former military conflict areas  
38 and at manufacturing and decommissioning plants. In field test plots at a former explosives  
39 manufacturing site, removal of TNT and dinitrotoluenes (DNTs) was observed following periods  
40 of tillage. Since tilling of soils has previously been shown to alter the microbial community, this  
41 study was aimed at understanding how the microbial community is altered in soils with historical  
42 contamination of nitro explosives from the former Barksdale TNT plant. Samples of untilled  
43 pristine soils, untilled TNT-contaminated soils and tilled TNT-contaminated soils were  
44 subjected to targeted amplicon sequencing of 16S ribosomal RNA genes in order to compare the  
45 structure of their bacterial communities. In addition, metagenomic data generated from the  
46 TNT tilled soil was used to understand the potential functions of the bacterial community relevant  
47 to nitroaromatic degradation. While the biodiversity dropped and the *Burkholderiales* order  
48 became dominant in both tilled and untilled soil regardless of tillage, the bacterial community  
49 composition at finer taxonomic levels revealed a greater difference between the two  
50 treatments. Functional analysis of metagenome assembled genome (MAG) bins through  
51 systematic review of commonly proposed DNT and TNT biotransformation pathways suggested  
52 that both aerobic and anaerobic degradation pathways were present. A proposed pathway that  
53 considers both aerobic and anaerobic steps in the degradation of TNT in the scenario of the tilled  
54 contaminated soils is presented.

## 55 **2. Importance:**

56 In this study, TNT and DNT removal has been observed in field-scale experiments following  
57 periodic tilling of historically contaminated soils. The microbial community structures of  
58 uncontaminated pristine soils, untilled contaminated soils, and tilled contaminated soils were  
59 investigated using high-throughput sequencing platforms. In addition, shotgun metagenome  
60 libraries of samples from tilled contaminated soils were generated. The results indicated that a  
61 significant shift of the bacterial community at the family level between tilled and untilled  
62 contaminated soils, with tilled soils being dominated by *Alcaligenaceae* and untilled soils by  
63 *Burkholderiaceae*. In-depth metagenomic analysis of samples from tilled contaminated soils

64 indicate the presence of genes that encode for enzymes that potentially could lead to mineralization  
65 of TNT and DNT under mixed aerobic and anaerobic periods.

66 **Keywords:** Bioremediation, mechanical tillage, microbial biodiversity, trinitrotoluene (TNT),  
67 dinitrotoluene (DNT), metagenomics, bioinformatics.

### 68 **3. Introduction**

69 2,4,6-Trinitrotoluene (TNT), an anthropogenic nitroaromatic explosive synthesized by successive  
70 nitration of toluene, is ranked high in the Priority List of Hazardous Substances (ATSDR 2000).  
71 Manufacturing plants and military sites are major sources of environmental pollution  
72 of explosives (Stenuit and Agathos 2010, Stenuit and Agathos 2011, Stenuit and Agathos 2011,  
73 USEPA 2014). In former manufacturing plants, high concentration of TNT in soils (over 100  
74 mg/kg soil) can persist for long periods of time (Hewitt, Jenkins et al. 2003, Pennington, Jenkins  
75 et al. 2006). In addition, mononitrotoluenes (MNTs) and dinitrotoluenes (DNTs) are often found  
76 as co-contaminants where TNT is manufactured. To deal with TNT contamination, many physico-  
77 chemical processes have been proposed and have achieved varying degrees of success. Granular  
78 activated carbon was an effective way to remove TNT in water, but it is an expensive and less  
79 efficient option for treating soil-bound contamination (Spain, Hughes et al. 2000, Moteleb,  
80 Suoidan et al. 2001). Incineration has also been used for treating TNT contaminated soils,  
81 however, the high cost and the environmental burdens of incineration (e.g., production of toxic ash  
82 and greenhouse gas emissions) limits its use at large scale (USEPA 2005).

83 Bioremediation of TNT contaminated sites has been proposed as an environmentally-friendly and  
84 cost-effective alternative to physico-chemical treatment (Díaz, Ferrández et al. 2001, Gerth,  
85 Hebner et al. 2003, Gerth and Hebner 2007). Many microorganisms are able to cleave aromatic  
86 rings through oxygenase-catalyzed upper biodegradation pathways and assimilate its carbon  
87 skeletons for growth using central metabolic intermediates, but oxygenolytic biodegradation  
88 pathways are limited to mono- and di-nitroaromatic compounds (e.g., MNTs and DNTs) (Díaz,  
89 Ferrández et al. 2001). The presence of three electron-withdrawing nitro substituents inserted on  
90 the aromatic ring of TNT restricts similar oxidative cleavage mechanism for TNT (Rieger,  
91 Sinnwell et al. 1999). As opposed to electrophilic attacks by oxygenases, reductive  
92 biotransformation of TNT to 2-hydroxylamino-4,6-dinitrotoluene (2-OHADNT), 2-amino-4,6-

93 dinitrotoluene (2-ADNT), 4-amino-2,6-dinitrotoluene (4-ADNT), 2,4-diamino-6-nitrotoluene  
94 (2,4-DANT), and 2,6-diamino-4-nitrotoluene (2,6-DANT) has been frequently  
95 reported (Boopathy and Kulpa 1992, Duque, Haidour et al. 1993, Funk, Roberts et al. 1993, Pasti-  
96 Grigsby, Lewis et al. 1996, Fiorella and Spain 1997, Widrig, Boopathy et al. 1997), with strict  
97 anaerobic conditions leading to the production of 2,4,6-triaminotoluene (TAT) (Hawari, Halasz et  
98 al. 1998). Consequently, a number of bioremediation strategies based on reductive  
99 biotransformation of TNT and TNT derivatives have been implemented, including soil slurry  
100 reactors (Funk, Roberts et al. 1993, Montgomery, Coffin et al. 2013), composting (Boopathy,  
101 Manning et al. 1998, Achtnich, Sieglen et al. 1999), and land farming (Boopathy and Kulpa  
102 1992). While reductive biotransformation of TNT has been promising, it is not by far an ultimate  
103 solution, as the toxic derivatives may still accumulate in living organisms (Lachance, Renoux et  
104 al. 2004, Kuperman, Checkai et al. 2005) or eventually be released into water via weathering  
105 processes (Kuperman, Checkai et al. 2005, Taylor, Lever et al. 2009). TNT denitration, i.e., the  
106 release of nitrite ions and formation of TNT-denitrated metabolites via reductive nucleophilic  
107 attacks by hydride ions catalyzed by hydride transferases (van Dillewijn, Wittich et al. 2008), was  
108 proposed as a prerequisite for subsequent oxidative cleavage of the aromatic ring. Only a rare study  
109 reported an oxidative microbial degradation pathway of TNT (Tront and Hughes 2005), which  
110 generates the metabolic intermediate 3-methyl-4,6-dinitrocatechol after TNT denitration. In this  
111 study, <sup>14</sup>C-labeled TNT degradation in combination with the production of <sup>14</sup>C-labeled  
112 CO<sub>2</sub>, organic metabolites and nitrite was observed in laboratory microcosm  
113 incubations constructed with soil samples from a historically contaminated site located in  
114 Wisconsin (Tront and Hughes 2005, Akkaya, Nikel et al. 2019).

115 Although there is lack of significant evidence of an oxidative pathway for mineralization of TNT,  
116 a series of test plots were setup at the historically contaminated site in Wisconsin (Barksdale TNT  
117 plant) where periodic tilling was implemented, and the levels of different nitroaromatics were  
118 monitored. In the Barksdale TNT plant study, TNT contaminated soil plots were aerated through  
119 tilling from 2007 to 2012. Tillage was carried out each season, while it was performed more often  
120 (once in a month) during the summer from June to September. Chemical analyses of samples from  
121 this study showed significant decreases in the concentration of TNT (Figure 1) and DNTs (not  
122 shown) was observed in tilled soils. Both the historical contamination of nitroaromatics and the  
123 process of tillage likely had a significant impact on the soil microbiota composition and function.

124 Prior studies have shown that anthropogenic activities, such as tilling, can change the physical and  
125 chemical properties of the soil thereby affecting the soil bacterial community structure (George,  
126 Liles et al. 2009, Kihara, Martius et al. 2012, Lupwayi, Lafond et al. 2012, Navarro-Noya, Gómez-  
127 Acata et al. 2013). Navarro-Noya et al. (2013) investigated the effect of tillage, soil physical and  
128 chemical properties, and crop-rotation on soil bacterial community structure. At the phylum level,  
129 relative abundances of *Actinobacteria*, *Beta-Proteobacteria* and *Gamma-Proteobacteria* were  
130 affected by the tillage treatment in this study. Soil total organic carbon (TOC), total nitrogen, and  
131 pH , affected the relative abundance of *Bacteroidetes*, *Beta-Proteobacteria*, *Cyanobacteria* and  
132 *Gemmatimonadetes*. In another work, the effect of TNT contamination on microbial community  
133 was compared with pristine soil (George, Eyers et al. 2008). Denaturing gradient gel  
134 electrophoresis (DGGE) of 16S rRNA gene amplicons was applied to study bacterial community  
135 composition in TNT contaminated soil and pristine soil samples. TNT contamination caused a  
136 shift in bacterial community composition, with *Pseudomonadaceae* and *Xanthomonadaceae* as the  
137 dominant families detected in TNT contaminated soil. While bacterial community structure in soil  
138 has been shown to change as a result of mechanical aeration and TNT contamination separately,  
139 no studies have investigated the effects of both.

140 In this study, high-throughput sequencing of phylogenetic marker genes was applied  
141 to elucidate the microbial community structure of bacteria under the impact of historical  
142 nitroaromatics contamination and subsequent periodic tillage. Samples were collected from  
143 untilled-contaminated soils, tilled-contaminated soils, and pristine soils from the former Barksdale  
144 TNT manufacturing plant. In addition to the taxonomic study, the metagenomic composition of  
145 nitroaromatic-contaminated soil under tillage treatment was investigated to determine which  
146 metabolic pathways could play a role in degradation of nitroaromatics. A customized pipeline  
147 incorporating metagenomic binning approaches helps us recover genetic information of key  
148 populations of the microbial community that exist in tilled, nitroaromatics contaminated soils.

149

150

151

152

## 153 **4. Materials and Methods**

#### 154 **4.1. Field-scale Mechanical Tillage Experiments**

155 Soil samples used for DNA extraction were collected in triplicates on a single date in 2012  
156 from the former Barksdale TNT plant at three different field sites. Vegetation clearance was  
157 performed prior to the construction of the field plots. The first site represented a pristine area  
158 (“Pristine”) that was not contaminated by nitro-aromatic explosives. The second site had  
159 previously contained a ditch that received TNT-containing storm water from nearby buildings  
160 where TNT was manufactured (“Untilled + TNT”). The third site was a 8.5 m by 10.9 m field  
161 plot that received wastewater discharge from TNT manufacturing processes (“Tilled + TNT”),  
162 which was not tilled before 2008. In order to be able to compare the untilled and tilled samples  
163 with TNT contamination, the two sites chosen are located in close proximity to each other,  
164 with the same soil characteristics (structure and texture) and similar TNT concentrations.  
165 Construction of the field plots consisted of clearance of vegetation and debris (including large  
166 pieces of TNT and DNT crystals) followed by mechanical tillage to improve aeration of the  
167 soil. The tiller could reach an effective depth of 56 cm. The plots were managed to avoid  
168 saturation of the soils and subsequent anoxic conditions. Surface water was prevented from  
169 entering the plot by shallow soil mounds constructed of topsoil piled and compacted along the  
170 uphill sides of the plot. Storm water from heavy rains was managed using sedimentation traps  
171 and silt fencing. To keep storm water from saturating the pore space of the tilled material, drain  
172 tiles were installed below the tilled depth from the test plots to a trap where the water was  
173 contained and eventually evaporated. Typically, the tillage events were carried out four times  
174 a year, usually once per month from June to September, if weather permitted. In the first year  
175 of plot construction and tillage, samples for the quantification of nitroaromatic explosive  
176 compounds, nitrate, nitrite, pH and soil moisture were collected after each tilling event. After  
177 the first-year samples were collected at the beginning and end of the field season, usually June  
178 and September. Nitroaromatic explosives were quantified using the EPA 8330, EPA 8321A,  
179 and EPA 8270 methods. At the time of sample collection for the study (June 2012) the plot  
180 had been tilled for five years.

#### 181 **4.2. Sampling and DNA Extraction from Field Test Plots**

182 Soil samples were collected from the top 15.2 cm of soil. Samples were shipped overnight on  
183 ice and stored at -20 °C until processing. The amount of soil used for DNA extraction ranged

184 from 4.5 to 10.5 g (no sieving of the soils was performed). DNA was isolated using the  
185 MoBio® PowerMax Soil DNA Isolation kit (Carlsbad, CA). The concentration of isolated  
186 DNA ranged from 2.3 to 30.3 ng/ $\mu$ L in a total elution volume of 5 mL, as measured by a  
187 Nanodrop 1000 spectrophotometer (Thermo Scientific, Wilmington, DE). Isolated DNA was  
188 stored at -20°C until further processing for amplicon sequencing.

### 189 **4.3. Illumina HiSeq 2000 Sequencing of 16S rRNA Gene**

190 Triplicate polymerase chain reaction (PCR) amplification was performed for each sample to  
191 minimize jackpot effects and PCR biases. PCR primers targeted the 16S rRNA gene V4  
192 hypervariable region (see PCR specifications and PCR primer design in Supplementary  
193 Information). PCR products from each individual sample were combined and purified with  
194 1.5% agarose gel electrophoresis. DNA was recovered using the Ultra-Clean® GelSpin® DNA  
195 Extraction Kit (Mo Bio Laboratories, Inc., Carlsbad, CA). For each individual sample, PCR  
196 products were quantified using Nanophotometer P-300 (Implem, Westlake Village, CA) and  
197 Nanodrop ND-3300 (Thermo Scientific, Inc., Waltham, MA). Individual PCR products with  
198 unique barcodes were mixed in equimolar ratios and the pooled samples, with the associated  
199 sequencing primers, were sent to the California Institute for Quantitative Biosciences (QB3  
200 facility, Vincent J. Coates Genomics Sequencing Laboratory, University of California,  
201 Berkeley). Quality control using Qubit® 2.0 Fluorometer (Life Technologies, Grand Island,  
202 NY) and quantitative PCR was conducted by the QB3 facility. Illumina® HiSeq 2000  
203 sequencing was performed for 150-bp nucleotide paired-end multiplex sequencing, according  
204 to the manufacturer's instructions. A control lane with balanced base genomic libraries was set  
205 to increase nucleotide diversity.

### 206 **4.4. Sequence Assembly**

207 Paired-end Illumina reads were assembled using Fast Length Adjustment of SHort reads  
208 (FLASH, version 1.2.6) (Magoč and Salzberg 2011). Overlap between paired-end reads of 150  
209 bp was set to range between 5 bp to its full length, with a maximum mismatch density of 50%.  
210 The assembled sequences were then demultiplexed in the open source software package  
211 Quantitative Insights Into Microbial Ecology (QIIME, version 1.7.0) (Caporaso, Kuczynski et  
212 al. 2010), using maximum consecutive low-quality bases of 5, minimum consecutive high-  
213 quality bases of 60% of the original reads, maximum N's of 5 and the default Phred quality



214 threshold of 3. Taxonomic assignment was performed in QIIME. For the 16S rRNA gene, the  
215 assembled sequences were assigned to Greengenes (version13\_5) OTUs at a threshold of 97%  
216 pairwise identity (McDonald, Price et al. 2012).

#### 217 **4.5. Taxonomical Analysis**

218 Alpha diversity of each sample was calculated using the Simpson index (Simpson 1949). Beta  
219 diversity was analyzed by using principal coordinate analysis (PCoA) with weighted UniFrac  
220 method guided by the Greengenes reference tree of 97% OTUs (Lozupone and Knight 2005).  
221 This was done for all OTUs identified, as well as for OTUs belonging to the order  
222 *Burkholderiales*. Phylogenetic tree for the family *Alcaligenaceae* was trimmed from the  
223 Greengenes reference tree. Statistical analysis of different soils was performed using two-tailed  
224 *t*-test with the assumption of unequal variance (Welch *t*-test), and *p*-values were corrected  
225 using the FDR correction (Storey 2002). Statistical significance was defined as tests with a *p*-  
226 value and *q*-value both lower than 0.05. In addition, term frequency-inverse document  
227 frequency (TF-IDF) feature selection was applied to identify OTUs characterizing the pristine  
228 and untilled soil samples as described by Lan *et al.* (Lan, Kriete et al. 2013).

#### 229 **4.6. Sequence Accession**

230 The 16S rRNA gene, ITS2 and metagenomic sequences are available in NCBI BioProject no.  
231 PRJNA235951.

#### 232 **4.7. Metagenomic Analysis of “Tilled + TNT”: Assembly, Binning, Gene Annotation and** 233 **Taxonomical classification**

234 Illumina reads were binned to investigate genes involved in degradation of TNT in the soil  
235 samples, as well as taxonomic classification of microbial community samples. Metagenomic  
236 studies were performed only for “Tilled + TNT” soil samples. There were three metagenomic  
237 libraries from the “Tilled + TNT” samples. Initially, the metagenomic data was filtered to  
238 remove low quality end of the reads using Sickle tool (Joshi and Fass 2011). Then, IDBA  
239 denovo assembly tool was used to assemble the whole metagenomic data (Peng, Leung et al.  
240 2010). IDBA output contigs was used as reference for binning. BinSanity (Graham,  
241 Heidelberg et al. 2017), MaxBin2 (Wu, Simmons et al. 2015), MetaBAT (Kang, Froula et al.  
242 2015), COCACOLA (Lu, Chen et al. 2017) and CONCOCT (Alneberg, Bjarnason et al. 2014)



243 were used for binning of the metagenomic libraries. To improve the quality of the bins,  
244 DASTools was used to refine the bins of all five binning tools outputs (Sieber, Probst et al.  
245 2018). For quality assessment of the bins, CheckM (Parks, Imelfort et al. 2015) was used to  
246 evaluate DASTool bins. DASTools bins were submitted to RAST (Aziz, Bartels et al. 2008)  
247 and Kbase (Arkin, Cottingham et al. 2018) for annotation against SEED database (Overbeek,  
248 Begley et al. 2005). In addition to 16S rRNA taxonomic classification of bacterial community,  
249 taxonomic classification of the metagenome assembled genome (MAG) was also performed  
250 by using CheckM, PhyloPhlAn (Segata, Börnigen et al. 2013) and CAT/BAT (von Meijenfeldt,  
251 Arkhipova et al. 2019). DNT degradation pathway is also studied exclusively.

252 The sequence similarity of putative *dntD* genes in MAGs to extradiol ring cleavage  
253 dioxygenases in NCBI was determined by using the CLUSTALW software package  
254 (Thompson, Higgins et al. 1994) for multiple sequence alignment of translated amino acid  
255 sequences and generating a phylogenetic tree using FastTree package (Price, Dehal et al.  
256 2010).

## 257 **5. Results and Discussion**

### 258 **5.1. TNT removal in soil tillage experiment**

259 Although manufacturing of explosives ceased over 60 years ago at the Barksdale plant site, the  
260 high concentrations of TNT found in the investigated soil samples suggest that natural  
261 weathering and attenuation of TNT was minor. A recent tillage experiment started in 2007 on  
262 field plots at Barksdale demonstrated that periodic mechanical tillage could promote  
263 significant removal of TNT (Figure 1). The decrease of TNT concentration varies from plot to  
264 plot (Figure 1). Decreases in the concentrations of 2,4-DNT and 2,6-DNT were also observed.  
265 For example, in 2008 the mean concentrations for 2,4-DNT and 2,6-DNT were 530 and 70.6  
266 mg/kg, respectively (95% confidence intervals of 177-884 and 17.7-123.5 mg/kg, respectively)  
267 while in 2012 the mean concentrations had decreased to 25.3 and 9.8 mg/kg, respectively (95%  
268 confidence intervals of 7.7-43 and 2.9-16.7 mg/kg, respectively). Over this period,  
269 concentration of 2-A-4,6-DNT and 4-A-2,6-DNT did not change significantly. During year  
270 2012, combined nitrite/nitrate levels in the “Tilled + TNT” plot ranged from 12 to 73 mg/kg  
271 while soil pH ranged from neutral to slightly acidic (as low as 6.1). Active nitrate/nitrite

272 production can result in mild acidic soil, even if there are many other factors that could have  
273 affected pH (Fortner, Zhang et al. 2003, Han, Mukherji et al. 2011).

## 274 **5.2. Bacterial community structure dynamics by 16S rRNA and metagenomic analysis**

275 To explore the effects of nitroaromatic explosives contamination and gain new insights into  
276 possible effects of tillage and aeration on the contaminated soil native microbial community,  
277 a comparison microbial diversity of pristine soil, TNT contaminated soil (Untilled + TNT),  
278 and tilled TNT contaminated soil (Tilled + TNT) from the Barksdale site was carried out.  
279 Both DNT and TNT concentrations in the pristine soil were below the detection limit.  
280 DNT and TNT concentrations for TNT-contaminated soil treatments were acquired in 2012,  
281 the year when DNA extraction was performed. In the “Untilled + TNT” soil, TNT  
282 concentration was as high as 38,500 mg/kg, whereas it was an average of 2,595 mg/kg in the  
283 “Tilled + TNT” soil. In contrast, 2,4-DNT and 2,6-DNT concentrations in the soils were less  
284 different (32 mg/kg and 6 mg/kg in the untilled soil and 25 mg/kg and 10 mg/kg in the tilled  
285 soil). The lower concentrations of DNT in soils compared to TNT could be contributed to the  
286 fact that the primary manufacturing product was TNT (while DNT were undesired product),  
287 the relatively higher solubility of TNT (~100 mg/L) compared to DNT (~400 mg/L), and the  
288 fact that DNT is relatively more easily biodegraded as compared to TNT. As presented in Table  
289 1, the biodiversity (measured by the Simpson index) was clearly reduced in the contaminated  
290 soil samples (both untilled and tilled) in comparison to the pristine soil samples, as previously  
291 described (Eyers, George et al. 2004). Using weighted UniFrac for beta-diversity  
292 measurement, we generated the principal coordinate analysis (PCoA) plot from the OTU  
293 abundances (Figure 2), which demonstrates clear separations between the samples of different  
294 field plots and clustering among samples from the same field plot. TNT contamination  
295 decreases the overall microbial community diversity in TNT contaminated soils compared to  
296 pristine soils.

297 In another work, the effects of TNT contamination on microbial communities was compared  
298 with pristine soil (George, Eyers et al.) using denaturing gradient gel electrophoresis (DGGE)  
299 of 16S rRNA gene amplicons. It was found that TNT contamination caused a shift in the  
300 bacterial communities. In this study, dominant bacterial populations in TNT contaminated soil  
301 were *Pseudomonadaceae* and *Xanthomonadaceae*.

302 The structural differences among the samples were further discriminated at different taxonomic  
303 levels (*i.e.*, phylum, family, genus, and species levels). Figure 3 shows the relative abundances  
304 of different phyla in the three soils. Although most of the 16S rRNA genes from the pristine  
305 soil were annotated as *Proteobacteria* ( $47.2 \pm 13.2\%$ ) and *Acidobacteria* ( $25.9 \pm 11.8\%$ ), the  
306 bacterial structure in this soil was more diverse than in the contaminated soils (Table 1), where  
307 more than 90% of the sequences belonged to *Proteobacteria*.

308 To further examine which microbial assemblages were dominant in the microbial communities  
309 of the tilled and untilled TNT-contaminated samples, we compared the top six most abundant  
310 families across the samples. *Burkholderiaceae* dominated the untilled soil ( $79.7 \pm 3.0\%$ ) while  
311 *Alcaligenaceae* dominated the tilled soil ( $54.7 \pm 9.8\%$ ), both belonging to the order  
312 *Burkholderiales* (Figure 4). Interestingly, a PCoA plot just using OTUs belonging to  
313 *Burkholderiales* (Figure 5) clearly separated the three soils into different clusters, indicating  
314 the structural changes of this order may be correlated with TNT contamination and tilling.

315 At the genus level, *t*-test analysis was again performed between the soil samples (Table S1).  
316 Several genera were found to be significantly increased in the tilled soil compared to the  
317 untilled or pristine soils, including *Achromobacter*, *KD1-23*, *Luteimonas*, *Microbacterium*,  
318 *Mycoplana*, *Pedobacter*, *Phaeospirillum*, *Pseudomonas*, *Salinibacterium*, *Thermomonas*,  
319 *Thiobacillus* and *Variovorax*. All these genera were relatively more abundant in the tilled  
320 samples, representing  $31.5 \pm 3.3\%$  of the sequences detected the tilled soil combined while  
321 only  $1.2 \pm 0.4\%$  in the pristine and  $4.3 \pm 2.1\%$  in the untilled soils, indicating that they may be  
322 favored by aerobic conditions caused by mechanical tillage. Among them, *Achromobacter*  
323 from the *Alcaligenaceae* family was the dominant genus in the tilled samples ( $14.5 \pm 3.4\%$ ).  
324 Consistent with the family level analysis, *Burkholderia* was the most abundant genus in the  
325 untilled, TNT-contaminated sample ( $78.7 \pm 2.8\%$ ) and was significantly higher in the untilled  
326 soil compared to both tilled ( $0.1 \pm 0.1\%$ ) and pristine ( $5.6 \pm 1.9\%$ ) soils. Through term  
327 frequency-inverse document frequency (TF-IDF) feature selection, a technique recently shown  
328 to be effective to identify features relevant to particular sample traits in metagenomic data  
329 (Lan, Kriete et al. 2013), we examined the difference between the pristine and untilled TNT-  
330 contaminated samples at the genus level. We found that in addition to *Burkholderia*, there was  
331 a small presence of *Thauera* in the untilled TNT-contaminated soil, which has been shown to  
332 grow on toluene in aerobic and anaerobic conditions (Shinoda, Sakai et al. 2004).

333 The most abundant OTU detected in the pristine soil was a *Xanthomonadaceae* (Greengenes  
334 OTU 105699) that accounted for only  $7.0 \pm 1.3\%$  of the sample, demonstrating the high  
335 diversity observed in the pristine soil. In contrast, the two most abundant OTUs in the untilled  
336 TNT-contaminated soil belonged to the *Burkholderia* genus and accounted for  $29.0 \pm 6.0\%$   
337 (Greengenes OTU 668303) and  $11.9 \pm 1.7\%$  (Greengenes OTU 125947) of the samples. The  
338 most abundant OTU in the tilled soil belonged to the *Alcaligenaceae* family (Greengenes OTU  
339 565246), representing  $35.3 \pm 11.6\%$  of the tilled sample sequences whereas this family only  
340 accounted for 0.1% of the untilled and around 0.2% of the pristine samples. A phylogenetic  
341 tree of *Alcaligenaceae* OTUs present (Figure 6) illustrates that this strain of interest is most  
342 closely related to *Achromobacter*.

343 In addition to 16S rRNA analysis, metagenomic data used for taxonomical classification of  
344 “Tilled+TNT” soil plots. MAGs generated by DASTools and their related parameters are  
345 shown in Table S2. Twenty-two out of thirty-five bins had completeness more than 50%.  
346 Because, the contamination of generated bins was high, different approaches used to increase  
347 the reliability of the results. Phylogenetic classification of the MAGs was performed by  
348 CheckM, PhyloPhlAn and CAT/BAT. The results of MAGs phylogenetic classification are  
349 shown in Table S3. At the phylum level most of the metagenomic MAGs are classified as  
350 *Proteobacteria*. At genus level, a MAG is assigned to *Achromobacter* and another MAG is  
351 assigned to *Pseudomonas*, which confirms 16S rRNA based taxonomical classifications.

352 As observed in many bioremediation studies, the presence of contaminants is often associated  
353 with a decrease of biodiversity (species richness and evenness) and the presence of a few  
354 dominant phylotypes that can tolerate and/or take advantage of the selective pressure imposed  
355 by the contaminants (Smit, Leeflang et al. 1997, Ruberto, Vazquez et al. 2003, Vinas, Sabaté  
356 et al. 2005, Baek, Yoon et al. 2007). In our 16S rRNA gene analysis, we also found a  
357 correlation between the presence of TNT and a significant decrease in the overall biodiversity  
358 (Table 1 and Figure 2). In addition, *Proteobacteria* dominated the bacterial communities in  
359 both TNT-contaminated soils. This result is consistent with previous studies examining the  
360 effects of TNT contamination on soil microbial communities (Gong, Gasparrini et al. 2000,  
361 Siciliano, Gong et al. 2000, George, Eysers et al. 2008, Travis, Bruce et al. 2008, Limane, Muter  
362 et al. 2011).

363 Although *Proteobacteria* dominated both TNT-contaminated soils in this study, the  
364 microorganisms that were able to survive in the presence of TNT (*i.e.*, OTUs with high relative  
365 abundances) differed between untilled and tilled soils. In particular, the dominance of the  
366 *Burkholderiaceae* family in the untilled TNT-contaminated soil is remarkable. As the  
367 biodiversity decreased relative to the pristine samples, *Burkholderiaceae* became the most  
368 dominant microbial family in the untilled, TNT-contaminated soil, suggesting that it has high  
369 tolerance for TNT or is highly competitive in the presence of TNT. In the untilled, TNT-  
370 contaminated soils, about 99% of the *Burkholderiaceae* are from the genus *Burkholderia*,  
371 which is consistent with previous findings that some *Burkholderia* strains are chemo-attracted  
372 to TNT (Leungsakul, Keenan et al. 2005).

373 In contrast with the untilled soils that were dominated by *Burkholderia*, the most abundant  
374 OTU family in the tilled soils belonged to *Alcaligenaceae* (Greengenes OTU 565246). This  
375 strain, which is closest to the genus *Achromobacter*, was highly abundant in the tilled soil,  
376 while only composing a fairly small amount of the pristine and untilled soils. In addition,  
377 *Achromobacter* OTUs in total accounted for  $14.6 \pm 3.5\%$  of the tilled soils, while less than  
378 0.1% in the other two soils. *Achromobacter* sp. DNT (formerly *Burkholderia* sp. DNT) and  
379 *Achromobacter* sp. NDT3 has been reported to mineralize 2,4-DNT and *Achromobacter*  
380 *xylosoxidans* degrades 2,6-DNT (Parales, Spain et al. 2005, Hudcova, Halecky et al. 2011,  
381 Perez-Pantoja, Nikel et al. 2013). BLAST the 16S rRNA gene from the *Alcaligenaceae* strain  
382 we identified, against the non-redundant NCBI database revealed a 98% percent identity match  
383 to the 16S rRNA gene in *Achromobacter xylosoxidans* AUI1011 (GI: 15384334), suggesting  
384 that this particular genus was involved in the removal of TNT. In a study by Gumuscu and  
385 Tekinay (2013), a novel strain of *Achromobacter spanius* STE11 identified which was capable  
386 of producing DNT and using TNT as the only nitrogen source over a wide range of pH (4.0-  
387 8.0). It is possible that the increased presence of *Achromobacter* sp. observed in the “Tilled +  
388 TNT” soil reflects a role in the observed decreases in concentrations of TNT and DNT isomers.

### 389 **5.3. Metagenomic data analysis, genes and annotation**

390 While taxonomic analyses indicated which OTUs are dominant in tilled, TNT-contaminated  
391 soils, further analysis of the metagenomic data could reveal what functional capabilities (*i.e.*,  
392 gene content) of certain microorganisms exist under tilled, TNT-contaminated conditions. A

393 customized pipeline to cluster reads from the metagenomic libraries into MAGs  
394 was used to functionally characterize the gene content of “binned” populations in the  
395 microbial community, as well as taxonomically classify each MAG. Then, each individual  
396 MAGs were examined for the presence of specific genes associated with nitroaromatic  
397 transformation, aromatic ring metabolism, and nitrogen metabolism. The major focus of the  
398 functional analysis of the bins was on previously proposed biotransformation pathways of  
399 DNT and TNT (Hughes, Wang et al. 1998, Esteve-Núñez, Caballero et al. 2001, Johnson, Jain  
400 et al. 2002), which are discussed separately in the sections below.

### 401 **5.3.1. TNT transformation**

402 Although MNT and DNT compounds can be oxidatively cleaved, the symmetrical  
403 arrangement of nitro groups on TNT makes the aromatic ring electron-deficient and  
404 electrophilic, which in turn prevents oxidative attacks of TNT using electrophilic-driven  
405 oxidation by oxygenases. This arrangement favors reductive, nucleophilic transformation  
406 mechanisms (Stenuit, Eyers et al. 2009), under both aerobic and anaerobic conditions. There  
407 are three major scenarios proposed for initial TNT transformation: (i) reduction of nitro  
408 moieties, (ii) production of Meisenheimer complexes of TNT through nucleophilic attacks by  
409 hydride ions, and (iii) Bamberger Rearrangement. Following these initial  
410 transformation scenarios for TNT, the products of the initial step can undergo different  
411 intermediate steps before the aromatic ring is cleaved and completely mineralized. These  
412 Intermediate Steps and Mineralization pathways are described below. In our work, metabolic  
413 pathways of the aforementioned scenarios are used as reference to construct possible TNT  
414 transformation pathways present in the microbial community of the tilled, TNT-contaminated  
415 soil based on the gene content of our MAGs.

#### 416 **5.3.1.1. Initial Transformation Scenarios**

417 **5.3.1.1.1. Reduction of nitro moieties of TNT:** Reduction of nitro moieties of  
418 TNT could proceed through both aerobic and anaerobic conditions (Esteve-Núñez,  
419 Caballero et al. 2001). A few studies (Crawford 1995, Ederer, Lewis et al. 1997)  
420 showed that the nitro (-NO<sub>2</sub>) moieties of TNT can be reduced to nitroso (-  
421 NO), hydroxylamino (-NHOH) and eventually amino (-NH<sub>2</sub>) groups. Since  
422 this nitroreduction could happen to any of the three nitro moieties on TNT, many



423 different combinations of reduced products can form. Complete reduction of all nitro  
424 groups in TNT eventually results in triaminotoluene (TAT), only under strict  
425 anaerobic conditions. When nitro groups are completely reduced to amino groups, they  
426 are believed to dissociate from the aromatic rings (Boopathy and Kulpa 1994, Vorbeck,  
427 Lenke et al. 1994, Crawford 1995, Ederer, Lewis et al. 1997, Esteve-Núñez, Caballero  
428 et al. 2001).

429 Genes contents of MAGs were investigated to find out possible scenarios in TNT  
430 degradation (Figure 7 and Table 2). Genes encoding for nitroreductases that catalyze  
431 reduction reactions on nitroaromatic compounds were detected in our MAGs (Gao,  
432 Ellis et al. 2009). There are two different types of the nitroreductases: oxygen-sensitive  
433 (type II) and oxygen-insensitive (type I). Some experimental studies (Mason and  
434 Holtzman 1975, Peterson, Mason et al. 1979) showed that TNT are reduced by both  
435 types of nitroreductases and also by hydride transferase type I and type II (van  
436 Dillewijn, Wittich et al. 2008, Stenuit and Agathos 2010). Oxygen-sensitive  
437 nitroreductases (type II) reduce the nitro groups of TNT only under anaerobic condition  
438 (Somerville, Nishino et al. 1995, Esteve-Núñez, Caballero et al. 2001, Roldán, Pérez-  
439 Reinado et al. 2008). Oxygen insensitive nitroreductases (type I), on the other hand,  
440 could reduce nitro groups of TNT under both aerobic and anaerobic condition.  
441 Sequence alignment of nitroreductases genes in our MAGs showed that only type I  
442 NAD(P)H nitroreductase enzymes are present. The presence of genes for type I  
443 nitroreductases means that reduction of nitro groups on TNT could proceed throughout  
444 the cycling between aerobic and anaerobic condition due to periodic tilling.

445 **5.3.1.1.2. Meisenheimer complexes:** The electron-withdrawing inductive (-I)  
446 and resonance (-M) effects of the nitro group makes the aromatic ring of TNT prone to  
447 nucleophilic attacks to generate reaction adducts, such as hydride  
448 Meisenheimer complexes (McFarlan 1999, Esteve-Núñez, Caballero et al. 2001, Gao,  
449 Ellis et al. 2009). Formation of monohydride and dihydride Meisenheimer complexes  
450 of TNT ( $H^-TNT$  and  $2H^-TNT$ ) under aerobic conditions have been confirmed  
451 experimentally (Vorbeck, Lenke et al. 1994, French, Nicklin et al. 1998) and can lead  
452 to the removal of a nitro group leading TNT-denitrated metabolites. Under aerobic  
453 conditions, the formed dinitrotoluene could transform to nitrotoluenes, which can be



454 further metabolized (Gao, Ellis et al. 2009). The nitro groups of  
455 the dinitrotoluenes formed from the Meisenheimer complexes could  
456 undergo nitroreduction, as described above or degrade aerobically as described  
457 below. We investigated two enzymes have been reported to play a key role in  
458 transformation of TNT to TNT-denitrated metabolites through Meisenheimer  
459 complexes. One of these key enzyme which catalyzes formation of Meisenheimer  
460 nitroreductases is pentaerythritol tetranitrate (PETN) reductase (French, Nicklin et al.  
461 1998). Another enzyme which have been investigated in this study is NADH-dependant  
462 flavoprotein oxidoreductase (XenB). This enzyme reduces TNT by formation of  
463 dihydride Meisenheimer complexes (Blehert, Fox et al. 1999). In-depth analysis of our  
464 constructed MAGs showed that there are no genes attributed to PETN reductase or  
465 XenB. This means that Meisenheimer complexes formation could not be a possible  
466 scenario in initial transformation of TNT in the Tilled+TNT contaminated soil plots in  
467 this study.

468 **5.3.1.1.3. Bamberger Rearrangement:** The Bamberger  
469 Rearrangement pathway is an alternative TNT transformation pathway that  
470 is presumed to be only possible under strictly anaerobic conditions (Hughes, Wang et  
471 al. 1998, Ahmad and Hughes 2000). In this pathway, after the reduction of nitro groups  
472 and formation of dihydroxylaminonitrotoluene (DHANT) under either aerobic or  
473 anaerobic conditions, DHANT could transform under strict anaerobic conditions to 2-  
474 amino-4-hydroxylamino-5-hydroxyl-6-nitrotoluene and hydroxylamine-4-amino-5-  
475 hydroxyl-6-nitrotoluene (Figure 7). In the Bamberger Rearrangement pathway,  
476 TNT is reduced by hydrogenase and carbon monoxide dehydrogenase enzymes by  
477 way of ferredoxin or methyl viologen (Huang, Lindahl et al. 2000). We investigated  
478 the presence of the genes encoding for these Bamberger Rearrangement genes in our  
479 constructed MAGs (Table 2). Although key genes (carbon monoxide  
480 dehydrogenase, monooxygenase and hydrogenase) in this pathway were found in a  
481 number of our MAGs (Table 2), they were not obligate anaerobic species such  
482 as *Desulfovibrio* spp., *Clostridium pasteurianum* or *Clostridium thermoaceticum* (Bo  
483 oopathy, Kulpa et al. 1993, Khan, Bhadra et al. 1997, Hughes, Wang et al. 1998, Huang,  
484 Lindahl et al. 2000). The genera classification of the MAGs containing these

485 Bamberger Rearrangement genes are *Phenylobacterium*, *Methylibium*, *Acidovorax*,  
486 *Pseudomonas*, *Erythrobacter*, *Parvibaculum*, *Nitrospira*, *Caldimonas*, *Oceanibaculum*  
487 and *Nocardioides*. We searched for any publicly available genomes in NCBI belonging  
488 to genera that possess these key Bamberger Rearrangement genes (carbon monoxide  
489 dehydrogenase, monooxygenase and hydrogenase). We BLASTed the key genes from  
490 the MAGs against the NCBI genome data base. The results are summarized in (Table  
491 S4). The results indicate that at least one of the genes encoding these enzymes, is  
492 present in every genome of these genera (except *Caldimonas*) in NCBI data base (Table  
493 S4). Future experimental studies to validate the functionality of these genes that  
494 potentially encode the Bamberger Rearrangement enzymes from the aforementioned  
495 genera would be helpful for better understanding of nitroaromatic compounds  
496 transformations.

#### 497 **5.3.1.2. Intermediate Transformation**

498 After initial reduction of nitro moieties intermediate products of TAT or aminophenols  
499 are generated, respectively. Further transformation of these molecules up to aromatic  
500 ring cleavage, which we describe as “intermediate transformation steps” will be  
501 discussed here.

502 TAT, the intermediate products produced via nitroreductases, is an unstable molecule  
503 that has two different fates under aerobic and anaerobic conditions. Under aerobic  
504 conditions, TAT molecules can polymerize with other TAT molecules to form azo  
505 derivatives, (e.g., 2,2',4,4'-TA-6,6'-azoT and 2,2',6,6'-TA-4,4'-azoT). TAT azo  
506 derivatives are recalcitrant compounds that are considered as dead-end products in TNT  
507 degradation studies (Esteve-Núñez, Caballero et al. 2001). While under strictly  
508 anerobic and slightly acidic (pH 5-7) conditions, it has been reported that TAT  
509 transforms abiotically to 2,4,6 hydroxytoluene (THT) (Funk, Roberts et al. 1993). In our  
510 study, the pH of tilled, TNT contaminated soil is slightly acidic (pH 6.1) and there were  
511 periodic aeration and anaerobic conditions, which suggest that both TAT azo  
512 derivatives and THT could have been formed. It is hypothesized that THT could  
513 undergo ring cleavage and eventually be mineralized under aerobic conditions  
514 (Alneberg, Bjarnason et al. 2014, Sieber, Probst et al. 2018). Figure 8 is a pathway  
515 based on those proposed by Serrano et al (Serrano-González, Chandra et al. 2018) for

516 transformation of THT. In our study, the presence of genes associated with the aromatic  
517 ring cleavage pathway of THT in our constructed MAGs were found (Table 2 and  
518 Figure 8).

519 The first step in this pathway is transformation of THT to 4-hydroxytoluene, which is  
520 catalyzed by a trihydroxytoluene oxygenase (Figure 8). This is a key reaction in  
521 initiating ring cleavage of THT (Haigler, Johnson et al. 1999). The gene encoding  
522 trihydroxytoluene oxygenase is called *dntD* and was only previously reported to be  
523 found in a *Pseudomonas* capable of degrading nitroaromatic compounds (Monti,  
524 Smania et al. 2005). We found that *dntD* exists in a number of our MAGs (concoct.25,  
525 Maxbin.002.sub, Maxbin.019.sub, Maxbin.046.sub, Maxbin.075.sub, Meta.bin.18),  
526 including those taxonomically classified as *Achromobacter* and *Pseudomonas* (Tables  
527 2 and 3).

528 The Trihydroxytoluene oxygenase enzyme converts trihydroxytoluene to *p*-cresol.  
529 Themethyl group on *p*-cresol (4-hydroxytoluene) can then be oxidized by *p*-cresol  
530 dehydrogenase resulting in 4-hydroxybenzoate as the final product. The gene encoding  
531 for the *p*-cresol dehydrogenase enzyme is also detected in our MAGs (Table 2). The  
532 produced 4-hydroxybenzoate can be converted to 4-hydroxybenzoic acid, which could  
533 be enzymatically oxidized to protocatechuic acid (dihydroxybenzoic acid) by  
534 protocatechuate decarboxylase. Protocatechuate decarboxylase oxidizes  
535 protocatechuic acid to catechol (dihydroxybenzene). A number of the enzymes  
536 involved in converting THT to catechol exist in the MAGs (Table 2 and TableS5).

537 In addition to our proposed pathway, there many are alternative pathways for ring  
538 cleavage of aromatic compounds that hypothetically could lead to complete  
539 mineralization of THT. For example, the ring cleavage of hydroxybenzoate could occur  
540 through the Gentisate pathway. The gentisate 1,2-dioxygenase gene (*gtdA*) was found  
541 in Maxbin.046 (*Pseudomonas*) and Maxbin.075 (*Achromobacter*). The *gtdA* gene was  
542 also found in publicly available genomes of *Pseudomonas aeruginosa* and  
543 *Achromobacter xylosoxidans*. Other alternative pathways that we searched for in our  
544 MAGs for ring cleavage of THT intermediates are those listed in SEED Subsystems as  
545 “Metabolism of Aromatic Compounds” are shown in Table S5.

### 546           5.3.2. *DNT degradation:*

547           Transformation of DNT molecules are also another subject of our study because of its  
548           presence in the contaminated soils at the site. It was shown that DNT concentration  
549           decreased overtime in tilled soil and could potentially be due to biotransformation of DNT  
550           by microorganisms. Biological reductive transformation of DNT has been experimentally  
551           shown to proceed via nitroreductases similar to TNT described above (Kalafut, Wales et  
552           al. 1998). In addition, the asymmetrical structure of DNT makes direct oxidation under  
553           aerobic conditions—and hence aromatic ring cleavage—easier. Direct oxidation of DNT  
554           is catalyzed by a series of oxidative pathway enzymes and regulators encoded by *dnt* genes  
555           (Johnson, Jain et al. 2002, de las Heras, Chavarría et al. 2011, Perez-Pantoja, Nickel et al.  
556           2013, Akkaya, Pérez-Pantoja et al. 2018). This aerobic transformation pathway catalyzed  
557           by dioxygenases involves the oxidation and removal of the two nitro groups, released as  
558           nitrite ions, eventually leads to ring cleavage (Figure 9). DNT oxidation is started by a  
559           multi compound hydroxylation dioxygenase (*dntA*). Then, methylnitrocatechol is oxidized  
560           by a monooxygenase (*dntB*) to a methylquinone. This compound reduces to  
561           trihydroxytoluene by 2-hydroxy-5-methylquinone reductase (*dntC*), and eventually oxidize  
562           by THT oxygenase (*dntD*). Our MAGs were investigated for the aforementioned *dnt* genes  
563           and the results are summarized in Table 3. The *dnt* genes were observed in MAGs, which  
564           are associated to *Pseudomonas*, *Phenylobacterium* and *Achromobacter*. Previous studies  
565           also indicate that some strains of *Burkholderia*, such as *Burkholderia* sp. strain DNT  
566           (Haigler, Johnson et al. 1999) and *Achromobacter*, such as *Achromobacter* sp. NDT3  
567           (Hudcova, Halecky et al. 2011) are able to metabolize DNT.

568           Further interrogation of the putative *dntD* genes found in the MAGs was carried out to  
569           ensure they were more similar to 2,3,5-trihydroxytoluene (THT) 1,2-dioxygenase gene  
570           (*dntD*) found in *Burkholderia* sp. Strain DNT than other extradiol cleavage gene family I  
571           enzymes (Haigler, Johnson et al. 1999). The species name associated with accession  
572           number AF076848 provided for the *dntD* gene referenced in Haigler et al. (Haigler,  
573           Johnson et al. 1999) was *Burkholderia cepacia* (not strain associated with DNT). Amino  
574           acid sequences of the *dntD* genes detected in the MAGs were aligned with extradiol ring  
575           cleavage enzyme sequences from *Burkholderia cepacia* and other closely related species.

576 A phylogenetic tree was created to determine the proximity of our MAGs putative *dntD*  
577 genes to other extradiol ring cleavage enzymes. Figure 10 indicates that the putative *dntD*  
578 sequences from Metabin.18, Maxbin.46 and Maxbin.75 were more closely related to the  
579 *dntD* enzyme in *Burkholderia cepacia*, supporting their likely involvement in the observed  
580 DNT degradation in the tilled samples.

#### 581 ***4.3.3. Importance of OxyR and nitrogen assimilation genes in tilled, nitroaromatic*** 582 ***contaminated soils***

583 In addition to the genes that are directly involved in TNT and DNT transformations, we  
584 also examined microbial functions related to nitrogen assimilation of the ammonium and  
585 nitrite ions that are cleaved from TNT and DNT, as well those related to the ability of  
586 microbial populations to adapt to periods of aerobic condition in the tilled, TNT  
587 contaminated soils.

588 One of the genes investigated in this study is *OxyR*, a hydrogen peroxide-inducible  
589 activator. One by-product of the aerobic reactions discussed earlier is hydrogen peroxide  
590 that are toxic for living organisms. Microorganisms adopted a defense mechanism to  
591 overcome hydrogen peroxide (Lee, Godon et al. 1999, Chiang and Schellhorn 2012,  
592 Akkaya, Pérez-Pantoja et al. 2018). These microorganisms have groups of genes that  
593 reduce hydrogen peroxide to water. These genes are activated with *OxyR* which is a  
594 regulatory gene. *OxyR* is activated with high concentrations of hydrogen peroxide and  
595 starts translation of hydrogen peroxide reduction genes. In-depth analysis show that *OxyR*  
596 genes are present in number of our MAGs (Table 2). Presence of *OxyR* genes in our  
597 constructed MAGs is an indication of oxidative transformation activities in the soil. This  
598 is in agreement with our previous results that proposed pathways of complete aerobic  
599 degradation of DNT molecules and partial aerobic degradation of TNT molecules.

600 In addition to *OxyR*, we also examined nitrogen assimilation genes. Based on the proposed  
601 pathways for TNT and DNT transformation, nitrogen could be released in the form of  
602 nitrite groups or ammonia groups. TNT transformation is proposed to proceed through  
603 reduction of nitro groups in either aerobic or anaerobic conditions; While, nitro groups are  
604 released from DNT molecules under aerobic conditions. Investigation of MAGs shows  
605 presence of ammonia assimilatory genes as well as nitrate or nitrite reducing genes in a

606 number of the MAGs (Table S6). MAGs attributed to *Achromobacter* (Maxbin.75) and  
607 *Pseudomonas* (Maxbin.46) genera have genes encoding “Nitrate and nitrite  
608 ammonification” and “Ammonia assimilation” enzymes in SEED data base. Gumuscu and  
609 Tekinay (2013) identified a strain of *Achromobacter spanius STE11* capable of TNT and  
610 DNT transformation as the only nitrogen source over a wide range of pH (4.0-8.0).  
611 However, the *Achromobacter* strain only has an 83% 16S rRNA sequence identity to the  
612 strain we identified via our 16s rRNA amplicon libraries. It is possible that the increased  
613 presence of *Achromobacter sp.* observed in the “Tilled + TNT” soil reflects a role in the  
614 observed decreased concentrations of both DNT isomers and TNT.

## 615 **6. Conclusions**

616 In this study, TNT and DNT removal has been observed in field-scale experiments following  
617 periodic tilling of historically contaminated soils. Concomitantly, the microbial community  
618 structures of uncontaminated pristine soils, untilled contaminated soils, and tilled contaminated  
619 soils were investigated using high-throughput sequencing platforms. In addition, shotgun  
620 metagenome libraries of samples from tilled contaminated soils were generated. The major results  
621 gleaned from the microbial community data indicate a significant shift of the bacterial community  
622 at the family level between tilled and untilled contaminated soils, with tilled soils being dominated  
623 by *Alcaligenaceae* and untilled soils by *Burkholderiaceae*. At the genus level, *Acidovorax*,  
624 *Pseudomonas* and *Achromobacter* are dominant genera in “Tilled +TNT” soil (Table S1), with  
625 some members of the latter two genera reported as having the ability to degrade nitroaromatic  
626 compounds (Boopathy, Manning et al. 1994, Boopathy, Wilson et al. 1994, Somerville, Nishino  
627 et al. 1995, Parales, Spain et al. 2005, Hudcova, Halecky et al. 2011, Perez-Pantoja, Nikel et al.  
628 2013).

629 In-depth metagenomic analysis of samples from tilled contaminated soils indicate the presence of  
630 genes that encode for enzymes that potentially could lead to mineralization of TNT and DNT under  
631 mixed aerobic and anaerobic periods. Determination of MAGs from the metagenomic data allowed  
632 us to examine which microbial populations could potentially be involved in the different steps of  
633 TNT and DNT mineralization pathways. In addition, the presence of *OxyR* regulatory genes that  
634 protect cells from oxygen radicals in MAGs that can catalyze the oxidative reactions within the  
635 intermediate transformation steps of TNT and aerobic DNT transformation. MAGs were also

636 identified that could assimilate nitrate and ammonia from the aforementioned transformation of  
637 TNT and DNT in the tilled contaminated soils. Confirmation that TNT or DNT can be used by the  
638 microbial communities as a nitrogen source could be investigated by isotope labeling of carbon  
639 and nitrogen in TNT and DNT.

## 640 **Acknowledgements:**

641 We thank E.E. Mack formerly with DuPont Corporate Remediation Group, C. Pooler and S.  
642 Larson from AECOM, and B. Nave from Chemours Corporate Remediation Group for their  
643 contribution to site monitoring and sample collection.

644 The work performed by the Drexel Ecological and Evolutionary Signal-processing and Informatics  
645 (EESI) lab (Y. Lan and G.L. Rosen) was also supported in part by a National Science Foundation  
646 (NSF) CAREER award number #0845827, NSF award number #1120622, and Department of  
647 Energy (DOE) Office of Science (BER) award DE-SC0004335.

648 We thank J. Tremblay and S.G. Tringe of the Department of Energy Joint Genome Institute (DOE  
649 JGI, Walnut Creek, CA) for the design and optimization of 16S rRNA gene and ITS2 primers for  
650 targeted Illumina sequencing. This work used the Vincent J. Coates Genomics Sequencing  
651 Laboratory at UC Berkeley, supported by NIH S10 Instrumentation Grants S10RR029668 and  
652 S10RR027303.



## 653 7. References:

- 654 Achtnich, C., U. Sieglén, H. J. Knackmuss and H. Lenke (1999). "Irreversible binding of  
655 biologically reduced 2, 4, 6-trinitrotoluene to soil." Environmental Toxicology and Chemistry: An  
656 International Journal **18**(11): 2416-2423.
- 657 Ahmad, F. and J. B. Hughes (2000). "Anaerobic transformation of TNT by Clostridium."  
658 Biodegradation of nitroaromatic compounds and explosives: 185-212.
- 659 Akkaya, Ö., P. I. Nikel, D. Pérez-Pantoja and V. de Lorenzo (2019). "Evolving metabolism of 2,4-  
660 dinitrotoluene triggers SOS-independent diversification of host cells." Environmental  
661 Microbiology **21**(1): 314-326.
- 662 Akkaya, Ö., D. R. Pérez-Pantoja, B. Calles, P. I. Nikel and V. de Lorenzo (2018). "The Metabolic  
663 Redox Regime of Pseudomonas putida Tunes Its Evolvability toward Novel Xenobiotic  
664 Substrates." mBio **9**(4): e01512-01518.
- 665 Alneberg, J., B. S. Bjarnason, I. De Bruijn, M. Schirmer, J. Quick, U. Z. Ijaz, L. Lahti, N. J. Loman,  
666 A. F. Andersson and C. Quince (2014). "Binning metagenomic contigs by coverage and  
667 composition." Nature methods **11**(11): 1144.
- 668 Arkin, A. P., R. W. Cottingham, C. S. Henry, N. L. Harris, R. L. Stevens, S. Maslov, P. Dehal, D.  
669 Ware, F. Perez, S. Canon, M. W. Sneddon, M. L. Henderson, W. J. Riehl, D. Murphy-Olson, S.  
670 Y. Chan, R. T. Kamimura, S. Kumari, M. M. Drake, T. S. Brettin, E. M. Glass, D. Chivian, D.  
671 Gunter, D. J. Weston, B. H. Allen, J. Baumohl, A. A. Best, B. Bowen, S. E. Brenner, C. C. Bun,  
672 J.-M. Chandonia, J.-M. Chia, R. Colasanti, N. Conrad, J. J. Davis, B. H. Davison, M. DeJongh, S.  
673 Devoid, E. Dietrich, I. Dubchak, J. N. Edirisinghe, G. Fang, J. P. Faria, P. M. Frybarger, W.  
674 Gerlach, M. Gerstein, A. Greiner, J. Gurtowski, H. L. Haun, F. He, R. Jain, M. P. Joachimiak, K.  
675 P. Keegan, S. Kondo, V. Kumar, M. L. Land, F. Meyer, M. Mills, P. S. Novichkov, T. Oh, G. J.  
676 Olsen, R. Olson, B. Parrello, S. Pasternak, E. Pearson, S. S. Poon, G. A. Price, S. Ramakrishnan,  
677 P. Ranjan, P. C. Ronald, M. C. Schatz, S. M. D. Seaver, M. Shukla, R. A. Sutormin, M. H. Syed,  
678 J. Thomason, N. L. Tintle, D. Wang, F. Xia, H. Yoo, S. Yoo and D. Yu (2018). "KBase: The  
679 United States Department of Energy Systems Biology Knowledgebase." Nature Biotechnology  
680 **36**(7): 566-569.
- 681 ATSDR, T. (2000). "ATSDR (Agency for toxic substances and disease registry)." Prepared by  
682 Clement International Corp., under contract 205: 88-0608.
- 683 Aziz, R. K., D. Bartels, A. A. Best, M. DeJongh, T. Disz, R. A. Edwards, K. Formsma, S. Gerdes,  
684 E. M. Glass and M. Kubal (2008). "The RAST Server: rapid annotations using subsystems  
685 technology." BMC genomics **9**(1): 75.
- 686 Baek, K.-H., B.-D. Yoon, B.-H. Kim, D.-H. Cho, I.-S. Lee, H.-M. Oh and H.-S. Kim (2007).  
687 "Monitoring of microbial diversity and activity during bioremediation of crude oil-contaminated  
688 soil with different treatments." Journal of Microbiology and Biotechnology **17**(1): 67-73.
- 689 Blehert, D. S., B. G. Fox and G. H. Chambliss (1999). "Cloning and Sequence Analysis of Two  
690 Pseudomonas Flavoprotein Xenobiotic Reductases." Journal of bacteriology **181**(20): 6254-6263.
- 691 Boopathy, R., C. Kulpa and M. Wilson (1993). "Metabolism of 2, 4, 6-trinitrotoluene (TNT) by  
692 Desulfovibrio sp.(B strain)." Applied microbiology and biotechnology **39**(2): 270-275.
- 693 Boopathy, R. and C. F. Kulpa (1992). "Trinitrotoluene (TNT) as a sole nitrogen source for a  
694 sulfate-reducing bacterium Desulfovibrio sp. (B strain) isolated from an anaerobic digester."  
695 Current Microbiology **25**(4): 235-241.
- 696 Boopathy, R. and C. F. Kulpa (1994). "Biotransformation of 2,4,6-trinitrotoluene (TNT) by a  
697 Methanococcus sp. (strain B) isolated from a lake sediment." Can J Microbiol **40**(4): 273-278.

- 698 Boopathy, R., J. Manning and C. Kulpa (1998). "Biotransformation of explosives by anaerobic  
699 consortia in liquid culture and in soil slurry." International biodeterioration & biodegradation  
700 **41**(1): 67-74.
- 701 Caporaso, J. G., J. Kuczynski, J. Stombaugh, K. Bittinger, F. D. Bushman, E. K. Costello, N.  
702 Fierer, A. G. Pena, J. K. Goodrich and J. I. Gordon (2010). "QIIME allows analysis of high-  
703 throughput community sequencing data." Nature methods **7**(5): 335.
- 704 Chiang, S. M. and H. E. Schellhorn (2012). "Regulators of oxidative stress response genes in  
705 *Escherichia coli* and their functional conservation in bacteria." Archives of biochemistry and  
706 biophysics **525**(2): 161-169.
- 707 Crawford, R. L. (1995). "The microbiology and treatment of nitroaromatic compounds." Current  
708 Opinion in Biotechnology **6**(3): 329-336.
- 709 de las Heras, A., M. Chavarría and V. de Lorenzo (2011). "Association of dnt genes of  
710 *Burkholderia* sp. DNT with the substrate-blind regulator DntR draws the evolutionary itinerary of  
711 2, 4-dinitrotoluene biodegradation." Molecular microbiology **82**(2): 287-299.
- 712 Díaz, E., A. Ferrández, M. a. A. Prieto and J. L. García (2001). "Biodegradation of aromatic  
713 compounds by *Escherichia coli*." Microbiol. Mol. Biol. Rev. **65**(4): 523-569.
- 714 Duque, E., A. Haidour, F. Godoy and J. L. Ramos (1993). "Construction of a *Pseudomonas* hybrid  
715 strain that mineralizes 2, 4, 6-trinitrotoluene." Journal of Bacteriology **175**(8): 2278-2283.
- 716 Ederer, M. M., T. A. Lewis and R. L. Crawford (1997). "2,4,6-Trinitrotoluene (TNT)  
717 transformation by clostridia isolated from a munition-fed bioreactor: comparison with non-adapted  
718 bacteria." Journal of Industrial Microbiology and Biotechnology **18**(2): 82-88.
- 719 Esteve-Núñez, A., A. Caballero and J. L. Ramos (2001). "Biological degradation of 2,4,6-  
720 trinitrotoluene." Microbiology and molecular biology reviews : MMBR **65**(3): 335-352.
- 721 Eyers, L., I. George, L. Schuler, B. Stenuit, S. N. Agathos and S. El Fantroussi (2004).  
722 "Environmental genomics: exploring the unmined richness of microbes to degrade xenobiotics."  
723 Applied microbiology and biotechnology **66**(2): 123-130.
- 724 Fiorella, P. D. and J. C. Spain (1997). "Transformation of 2, 4, 6-Trinitrotoluene by *Pseudomonas*  
725 *pseudoalcaligenes* JS52." Appl. Environ. Microbiol. **63**(5): 2007-2015.
- 726 Fortner, J. D., C. Zhang, J. C. Spain and J. B. Hughes (2003). "Soil column evaluation of factors  
727 controlling biodegradation of DNT in the vadose zone." Environmental science & technology  
728 **37**(15): 3382-3391.
- 729 French, C. E., S. Nicklin and N. C. Bruce (1998). "Aerobic degradation of 2,4,6-trinitrotoluene by  
730 *Enterobacter cloacae* PB2 and by pentaerythritol tetranitrate reductase." Applied and  
731 environmental microbiology **64**(8): 2864-2868.
- 732 Funk, S. B., D. J. Roberts, D. L. Crawford and R. L. Crawford (1993). "Initial-phase optimization  
733 for bioremediation of munition compound-contaminated soils." Applied and environmental  
734 microbiology **59**(7): 2171-2177.
- 735 Gao, J., L. B. M. Ellis and L. P. Wackett (2009). "The University of Minnesota  
736 Biocatalysis/Biodegradation Database: improving public access." Nucleic Acids Research  
737 **38**(suppl\_1): D488-D491.
- 738 George, I., L. Evers, B. Stenuit and S. N. Agathos (2008). "Effect of 2,4,6-trinitrotoluene on soil  
739 bacterial communities." Journal of Industrial Microbiology & Biotechnology **35**(4): 225-236.
- 740 George, I., L. Evers, B. Stenuit and S. N. Agathos (2008). "Effect of 2, 4, 6-trinitrotoluene on soil  
741 bacterial communities." Journal of industrial microbiology & biotechnology **35**(4): 225-236.

742 George, I. F., M. R. Liles, M. Hartmann, W. Ludwig, R. M. Goodman and S. N. Agathos (2009).  
743 "Changes in soil Acidobacteria communities after 2,4,6-trinitrotoluene contamination." FEMS  
744 Microbiology Letters **296**(2): 159-166.

745 Gerth, A. and A. Hebner (2007). Risk assessment and remediation of military and ammunition  
746 sites. Advanced science and technology for biological decontamination of sites affected by  
747 chemical and radiological nuclear agents, Springer: 45-57.

748 Gerth, A., A. Hebner and H. Thomas (2003). "Natural Remediation of TNT-Contaminated Water  
749 and Soil." Acta biotechnologica **23**(2-3): 143-150.

750 Gong, P., P. Gasparrini, D. Rho, J. Hawari, S. Thiboutot, G. Ampleman and G. I. Sunahara (2000).  
751 "An in situ respirometric technique to measure pollution-induced microbial community tolerance  
752 in soils contaminated with 2, 4, 6-trinitrotoluene." Ecotoxicology and Environmental safety **47**(1):  
753 96-103.

754 Graham, E. D., J. F. Heidelberg and B. J. Tully (2017). "BinSanity: unsupervised clustering of  
755 environmental microbial assemblies using coverage and affinity propagation." PeerJ **5**: e3035.

756 Gumuscu, B. and T. Tekinay (2013). "Effective biodegradation of 2, 4, 6-trinitrotoluene using a  
757 novel bacterial strain isolated from TNT-contaminated soil." International biodeterioration &  
758 biodegradation **85**: 35-41.

759 Haigler, B. E., G. R. Johnson, W. C. Suen and J. C. Spain (1999). "Biochemical and genetic  
760 evidence for meta-ring cleavage of 2,4, 5-trihydroxytoluene in Burkholderia sp. strain DNT." Journal of bacteriology **181**(3): 965-972.

761 Han, S., S. T. Mukherji, A. Rice and J. B. Hughes (2011). "Determination of 2, 4-and 2, 6-  
762 dinitrotoluene biodegradation limits." Chemosphere **85**(5): 848-853.

763 Hawari, J., A. Halasz, L. Paquet, E. Zhou, B. Spencer, G. Ampleman and S. Thiboutot (1998).  
764 "Characterization of metabolites in the biotransformation of 2, 4, 6-trinitrotoluene with anaerobic  
765 sludge: role of triaminotoluene." Appl. Environ. Microbiol. **64**(6): 2200-2206.

766 Hewitt, A. D., T. F. Jenkins, T. A. Ranney, J. A. Stark and M. E. Walsh (2003). Estimates for  
767 explosives residue from the detonation of army munitions, ENGINEER RESEARCH AND  
768 DEVELOPMENT CENTER HANOVER NH COLD REGIONS RESEARCH ....

769 Huang, S., P. A. Lindahl, C. Wang, G. N. Bennett, F. B. Rudolph and J. B. Hughes (2000). "2,4,6-  
770 trinitrotoluene reduction by carbon monoxide dehydrogenase from Clostridium thermoaceticum."  
771 Applied and environmental microbiology **66**(4): 1474-1478.

772 Hudcova, T., M. Halecky, E. Kozliak, M. Stiborova and J. Paca (2011). "Aerobic degradation of  
773 2, 4-dinitrotoluene by individual bacterial strains and defined mixed population in submerged  
774 cultures." Journal of hazardous materials **192**(2): 605-613.

775 Hughes, J. B., C. Wang, K. Yesland, A. Richardson, R. Bhadra, G. Bennett and F. Rudolph (1998).  
776 "Bamberger Rearrangement during TNT Metabolism by Clostridium acetobutylicum."  
777 Environmental Science & Technology **32**(4): 494-500.

778 Johnson, G. R., R. K. Jain and J. C. Spain (2002). "Origins of the 2, 4-dinitrotoluene pathway."  
779 Journal of bacteriology **184**(15): 4219-4232.

780 Joshi, N. and J. Fass (2011). Sickle: A sliding-window, adaptive, quality-based trimming tool for  
781 FastQ files (Version 1.33)[Software].

782 Kang, D. D., J. Froula, R. Egan and Z. Wang (2015). "MetaBAT, an efficient tool for accurately  
783 reconstructing single genomes from complex microbial communities." PeerJ **3**: e1165.

784 Khan, T., R. Bhadra and J. Hughes (1997). "Anaerobic transformation of 2, 4, 6-TNT and related  
785 nitroaromatic compounds by Clostridium acetobutylicum." Journal of Industrial Microbiology and  
786 Biotechnology **18**(2-3): 198-203.

787

788 Kihara, J., C. Martius, A. Bationo, M. Thuita, D. Lesueur, L. Herrmann, W. Amelung and P. L.  
789 Vlek (2012). "Soil aggregation and total diversity of bacteria and fungi in various tillage systems  
790 of sub-humid and semi-arid Kenya." Applied Soil Ecology **58**: 12-20.  
791 Kuperman, R. G., R. T. Checkai, M. Simini, C. T. Phillips, J. E. Kolakowski and C. W. Kurnas  
792 (2005). "Weathering and aging of 2, 4, 6-trinitrotoluene in soil increases toxicity to potworm  
793 *Enchytraeus crypticus*." Environmental Toxicology and Chemistry: An International Journal  
794 **24**(10): 2509-2518.  
795 Lachance, B., A. Y. Renoux, M. Sarrazin, J. Hawari and G. I. Sunahara (2004). "Toxicity and  
796 bioaccumulation of reduced TNT metabolites in the earthworm *Eisenia andrei* exposed to amended  
797 forest soil." Chemosphere **55**(10): 1339-1348.  
798 Lan, Y., A. Kriete and G. L. Rosen (2013). "Selecting age-related functional characteristics in the  
799 human gut microbiome." Microbiome **1**(1): 2.  
800 Lee, J., C. Godon, G. Lagniel, D. Spector, J. Garin, J. Labarre and M. B. Toledano (1999). "Yap1  
801 and Skn7 control two specialized oxidative stress response regulons in yeast." Journal of  
802 Biological Chemistry **274**(23): 16040-16046.  
803 Leungsakul, T., B. G. Keenan, B. F. Smets and T. K. Wood (2005). "TNT and nitroaromatic  
804 compounds are chemoattractants for *Burkholderia cepacia* R34 and *Burkholderia* sp. strain DNT."  
805 Applied microbiology and biotechnology **69**(3): 321-325.  
806 Limane, B., O. Muter, J. Juhanson, M. Truu, J. Truu and H. Nolvak (2011). Characterization of  
807 microbial community structure after application of different bioremediation approaches in TNT  
808 contaminated soil. Environmental Engineering. Proceedings of the International Conference on  
809 Environmental Engineering. ICEE, Vilnius Gediminas Technical University, Department of  
810 Construction Economics ....  
811 Lozupone, C. and R. Knight (2005). "UniFrac: a new phylogenetic method for comparing  
812 microbial communities." Appl. Environ. Microbiol. **71**(12): 8228-8235.  
813 Lu, Y. Y., T. Chen, J. A. Fuhrman and F. Sun (2017). "COCACOLA: binning metagenomic  
814 contigs using sequence COMposition, read CoverAge, CO-alignment and paired-end read  
815 LinkAge." Bioinformatics **33**(6): 791-798.  
816 Lupwayi, N. Z., G. P. Lafond, N. Ziadi and C. A. Grant (2012). "Soil microbial response to  
817 nitrogen fertilizer and tillage in barley and corn." Soil and Tillage Research **118**: 139-146.  
818 Magoč, T. and S. L. Salzberg (2011). "FLASH: fast length adjustment of short reads to improve  
819 genome assemblies." Bioinformatics **27**(21): 2957-2963.  
820 Mason, R. P. and J. L. Holtzman (1975). "The role of catalytic superoxide formation in the O<sub>2</sub>  
821 inhibition of nitroreductase." Biochemical and biophysical research communications **67**(4): 1267-  
822 1274.  
823 McDonald, D., M. N. Price, J. Goodrich, E. P. Nawrocki, T. Z. DeSantis, A. Probst, G. L.  
824 Andersen, R. Knight and P. Hugenholtz (2012). "An improved Greengenes taxonomy with explicit  
825 ranks for ecological and evolutionary analyses of bacteria and archaea." The ISME journal **6**(3):  
826 610.  
827 McFarlan, S. (1999). "2, 4, 6-Trinitrotoluene pathway map." The University of Minnesota  
828 Biocatalysis/Biodegradation Database.  
829 Montgomery, M. T., R. B. Coffin, T. J. Boyd and C. L. Osburn (2013). "Incorporation and  
830 mineralization of TNT and other anthropogenic organics by natural microbial assemblages from a  
831 small, tropical estuary." Environmental pollution **174**: 257-264.



832 Monti, M. R., A. M. Smania, G. Fabro, M. E. Alvarez and C. E. Argaraña (2005). "Engineering  
833 *Pseudomonas fluorescens* for biodegradation of 2,4-dinitrotoluene." Applied and environmental  
834 microbiology **71**(12): 8864-8872.

835 Moteleb, M., M. Suoidan, J. Kim, J. Davel and N. Adrian (2001). "Anaerobic degradation of 2, 4,  
836 6-trinitrotoluene in granular activated carbon fluidized bed and batch reactors." Water science and  
837 technology **43**(1): 67-75.

838 Navarro-Noya, Y. E., S. Gómez-Acata, N. Montoya-Ciriaco, A. Rojas-Valdez, M. C. Suárez-  
839 Arriaga, C. Valenzuela-Encinas, N. Jiménez-Bueno, N. Verhulst, B. Govaerts and L. Dendooven  
840 (2013). "Relative impacts of tillage, residue management and crop-rotation on soil bacterial  
841 communities in a semi-arid agroecosystem." Soil Biology and Biochemistry **65**: 86-95.

842 Overbeek, R., T. Begley, R. M. Butler, J. V. Choudhuri, H. Y. Chuang, M. Cohoon, V. de Crecy-  
843 Lagard, N. Diaz, T. Disz, R. Edwards, M. Fonstein, E. D. Frank, S. Gerdes, E. M. Glass, A.  
844 Goesmann, A. Hanson, D. Iwata-Reuyl, R. Jensen, N. Jamshidi, L. Krause, M. Kubal, N. Larsen,  
845 B. Linke, A. C. McHardy, F. Meyer, H. Neuweger, G. Olsen, R. Olson, A. Osterman, V. Portnoy,  
846 G. D. Pusch, D. A. Rodionov, C. Ruckert, J. Steiner, R. Stevens, I. Thiele, O. Vassieva, Y. Ye, O.  
847 Zagnitko and V. Vonstein (2005). "The subsystems approach to genome annotation and its use in  
848 the project to annotate 1000 genomes." Nucleic Acids Res **33**(17): 5691-5702.

849 Parales, R. E., J. C. Spain and G. R. Johnson (2005). Bacterial Degradation of DNT and TNT  
850 Mixtures, CALIFORNIA UNIV DAVIS DEPT OF MICROBIOLOGY AND IMMUNOLOGY.

851 Parks, D. H., M. Imelfort, C. T. Skennerton, P. Hugenholtz and G. W. Tyson (2015). "CheckM:  
852 assessing the quality of microbial genomes recovered from isolates, single cells, and  
853 metagenomes." Genome Research **25**(7): 1043-1055.

854 Pasti-Grigsby, M. B., T. A. Lewis, D. L. Crawford and R. L. Crawford (1996). "Transformation  
855 of 2, 4, 6-trinitrotoluene (TNT) by actinomycetes isolated from TNT-contaminated and  
856 uncontaminated environments." Appl. Environ. Microbiol. **62**(3): 1120-1123.

857 Peng, Y., H. C. M. Leung, S. M. Yiu and F. Y. L. Chin (2010). IDBA – A Practical Iterative de  
858 Bruijn Graph De Novo Assembler, Berlin, Heidelberg, Springer Berlin Heidelberg.

859 Pennington, J. C., T. F. Jenkins, G. Appleman, S. Thiboutot, J. Brannon, A. D. Hewitt, J. Lewis,  
860 S. Brochu, E. Diaz and M. R. Walsh (2006). Distribution and fate of energetics on DoD test and  
861 training ranges, ENGINEER RESEARCH AND DEVELOPMENT CENTER VICKSBURG MS.

862 Perez-Pantoja, D., P. I. Nikel, M. Chavarría and V. de Lorenzo (2013). "Endogenous stress caused  
863 by faulty oxidation reactions fosters evolution of 2, 4-dinitrotoluene-degrading bacteria." PLoS  
864 genetics **9**(8).

865 Peterson, F. J., R. P. Mason, J. Hovsepian and J. L. Holtzman (1979). "Oxygen-sensitive and -  
866 insensitive nitroreduction by *Escherichia coli* and rat hepatic microsomes." J Biol Chem **254**(10):  
867 4009-4014.

868 Price, M. N., P. S. Dehal and A. P. Arkin (2010). "FastTree 2 – Approximately Maximum-  
869 Likelihood Trees for Large Alignments." PLOS ONE **5**(3): e9490.

870 Rieger, P.-G., V. Sinnwell, A. Preuß, W. Francke and H.-J. Knackmuss (1999). "Hydride-  
871 Meisenheimer complex formation and protonation as key reactions of 2, 4, 6-trinitrophenol  
872 biodegradation by *Rhodococcus erythropolis*." Journal of bacteriology **181**(4): 1189-1195.

873 Roldán, M. D., E. Pérez-Reinado, F. Castillo and C. Moreno-Vivián (2008). "Reduction of  
874 polynitroaromatic compounds: the bacterial nitroreductases." FEMS Microbiology Reviews **32**(3):  
875 474-500.

- 876 Ruberto, L., S. C. Vazquez and W. P. Mac Cormack (2003). "Effectiveness of the natural bacterial  
877 flora, biostimulation and bioaugmentation on the bioremediation of a hydrocarbon contaminated  
878 Antarctic soil." International Biodeterioration & Biodegradation **52**(2): 115-125.
- 879 Segata, N., D. Börnigen, X. C. Morgan and C. Huttenhower (2013). "PhyloPhlAn is a new method  
880 for improved phylogenetic and taxonomic placement of microbes." Nature communications **4**:  
881 2304.
- 882 Serrano-González, M. Y., R. Chandra, C. Castillo-Zacarias, F. Robledo-Padilla, M. d. J. Rostro-  
883 Alanis and R. Parra-Saldivar (2018). "Biotransformation and degradation of 2,4,6-trinitrotoluene  
884 by microbial metabolism and their interaction." Defence Technology **14**(2): 151-164.
- 885 Shinoda, Y., Y. Sakai, H. Uenishi, Y. Uchihashi, A. Hiraishi, H. Yukawa, H. Yurimoto and N.  
886 Kato (2004). "Aerobic and anaerobic toluene degradation by a newly isolated denitrifying  
887 bacterium, *Thauera* sp. strain DNT-1." Appl Environ Microbiol **70**(3): 1385-1392.
- 888 Siciliano, S. D., P. Gong, G. I. Sunahara and C. W. Greer (2000). "Assessment of 2, 4, 6-  
889 trinitrotoluene toxicity in field soils by pollution-induced community tolerance, denaturing  
890 gradient gel electrophoresis, and seed germination assay." Environmental Toxicology and  
891 Chemistry: An International Journal **19**(8): 2154-2160.
- 892 Sieber, C. M., A. J. Probst, A. Sharrar, B. C. Thomas, M. Hess, S. G. Tringe and J. F. Banfield  
893 (2018). "Recovery of genomes from metagenomes via a dereplication, aggregation and scoring  
894 strategy." Nature microbiology **3**(7): 836.
- 895 Simpson, E. H. (1949). "Measurement of diversity." Nature **163**(4148): 688.
- 896 Smit, E., P. Leeflang and K. Wernars (1997). "Detection of shifts in microbial community structure  
897 and diversity in soil caused by copper contamination using amplified ribosomal DNA restriction  
898 analysis." FEMS microbiology ecology **23**(3): 249-261.
- 899 Somerville, C. C., S. F. Nishino and J. C. Spain (1995). "Purification and characterization of  
900 nitrobenzene nitroreductase from *Pseudomonas pseudoalcaligenes* JS45." Journal of bacteriology  
901 **177**(13): 3837-3842.
- 902 Spain, J. C., J. B. Hughes and H.-J. Knackmuss (2000). Biodegradation of nitroaromatic  
903 compounds and explosives, CRC Press.
- 904 Stenuit, B. and S. N. Agathos (2011). "Biodegradation and bioremediation of TNT and other nitro  
905 explosives." Comprehensive Biotechnology **6**: 167-181.
- 906 Stenuit, B. and S. N. Agathos (2011). "Biodegradation and bioremediation of TNT and other nitro  
907 explosives."
- 908 Stenuit, B., L. Eyers, R. Rozenberg, J.-L. Habib-Jiwan, S. Matthijs, P. Cornelis and S. N. Agathos  
909 (2009). "Denitration of 2, 4, 6-trinitrotoluene in aqueous solutions using small-molecular-weight  
910 catalyst (s) secreted by *Pseudomonas aeruginosa* ESA-5." Environmental science & technology  
911 **43**(6): 2011-2017.
- 912 Stenuit, B. A. and S. N. Agathos (2010). "Microbial 2, 4, 6-trinitrotoluene degradation: could we  
913 learn from (bio) chemistry for bioremediation and vice versa?" Applied microbiology and  
914 biotechnology **88**(5): 1043-1064.
- 915 Storey, J. D. (2002). "A direct approach to false discovery rates." Journal of the Royal Statistical  
916 Society: Series B (Statistical Methodology) **64**(3): 479-498.
- 917 Taylor, S., J. H. Lever, J. Fadden, N. Perron and B. Packer (2009). "Outdoor weathering and  
918 dissolution of TNT and Tritonal." Chemosphere **77**(10): 1338-1345.
- 919 Thompson, J. D., D. G. Higgins and T. J. Gibson (1994). "CLUSTAL W: improving the sensitivity  
920 of progressive multiple sequence alignment through sequence weighting, position-specific gap  
921 penalties and weight matrix choice." Nucleic acids research **22**(22): 4673-4680.

- 922 Travis, E. R., N. C. Bruce and S. J. Rosser (2008). "Microbial and plant ecology of a long-term  
923 TNT-contaminated site." *Environmental pollution* **153**(1): 119-126.
- 924 Tront, J. M. and J. B. Hughes (2005). "Oxidative microbial degradation of 2, 4, 6-trinitrotoluene  
925 via 3-methyl-4, 6-dinitrocatechol." *Environmental science & technology* **39**(12): 4540-4549.
- 926 USEPA, U. E. P. A. (2005). Handbook on the Management of Munitions Response Actions, Office  
927 of Solid Waste and Emergency Response Washington, DC.
- 928 USEPA, U. E. P. A. (2014). Technical fact sheet-2, 4, 6-Trinitrotoluene (TNT), Office of Solid  
929 Waste and Emergency Response (5106P).
- 930 van Dillewijn, P., R.-M. Wittich, A. Caballero and J.-L. Ramos (2008). "Type II Hydride  
931 Transferases from Different Microorganisms Yield Nitrite and Diarylamines from  
932 Polynitroaromatic Compounds." *Applied and Environmental Microbiology* **74**(21): 6820-6823.
- 933 Vinas, M., J. Sabaté, M. J. Espuny and A. M. Solanas (2005). "Bacterial community dynamics and  
934 polycyclic aromatic hydrocarbon degradation during bioremediation of heavily creosote-  
935 contaminated soil." *Applied and Environmental Microbiology* **71**(11): 7008-7018.
- 936 von Meijenfeldt, F. A. B., K. Arkhipova, D. D. Cambuy, F. H. Coutinho and B. E. Dutilh (2019).  
937 "Robust taxonomic classification of uncharted microbial sequences and bins with CAT and BAT."  
938 [bioRxiv: 530188](https://doi.org/10.1101/2019.11.27.353018).
- 939 Vorbeck, C., H. Lenke, P. Fischer and H. J. Knackmuss (1994). "Identification of a hydride-  
940 Meisenheimer complex as a metabolite of 2,4,6-trinitrotoluene by a Mycobacterium strain."  
941 *Journal of Bacteriology* **176**(3): 932-934.
- 942 Widrig, D. L., R. Boopathy and J. F. Manning Jr (1997). "Bioremediation of TNT-contaminated  
943 soil: A laboratory study." *Environmental Toxicology and Chemistry: An International Journal*  
944 **16**(6): 1141-1148.
- 945 Wu, Y.-W., B. A. Simmons and S. W. Singer (2015). "MaxBin 2.0: an automated binning  
946 algorithm to recover genomes from multiple metagenomic datasets." *Bioinformatics* **32**(4): 605-  
947 607.

948

949

950



## 951 **Figure Legends**

952 **Figure 1.** TNT concentration in soil for each field plot, in its first year (2007) of mechanical  
953 tillage (blue bars) vs. in 2013 (red bars, except for plot 9 whose last measurement was in 2012).  
954 Many field plots show significant TNT loss (plot numbers in blue boxes).

955 **Figure 2.** Principle coordinate analysis generated from the 97% OTU abundances, using  
956 weighted UniFrac.

957 **Figure 3.** Relative abundances of different bacteria phyla in the three soils. While Proteobacteria  
958 dominates both the tilled and untilled soil, the remaining fraction of the microbial community is  
959 mostly composed of different phyla.

960 **Figure 4.** Relative abundances of the six most abundant bacteria families across different soils.  
961 Burkholderiaceae becomes the most dominant family that could survive TNT contamination, and  
962 after tilling, the relative abundance of Alcaligenaceae rapidly increased.

963 **Figure 5.** Principle coordinate analysis generated from the OTU abundances of Burkholderiales,  
964 using weighted UniFrac.

965 **Figure 6.** Phylogenetic tree and relative abundance of Alcaligenaceae OTUs identified in the soil  
966 samples. Negative log of relative abundance was shown for each OTU in the three soils, ranging  
967 from zero (green) to infinity (white). Leaf label for the most abundant OTU in the “Tilled +  
968 TNT” sample (Greengenes OTU 565246) was highlighted in yellow.

969 **Figure 7.** Initial transformation pathway of TNT based on gene content of constructed MAGs in  
970 tilled, TNT contaminated soil.

971 **Figure 8.** TAT degradation pathway based on the gene content of MAGs. TAT (1)  
972 transformation to 4-hydroxytoluene (2) by Trihydroxytoluene oxygenase enzyme. Then, methyl  
973 group on p-cresol (4-hydroxytoluene) oxidize and results 4-hydroxybenzoate. 4-hydroxybenzoic  
974 acid could oxidized to Protocatechuic acid. The next step in this pathway could be catechol  
975 (dihydroxybenzene).

976 **Figure 9.** DNT degradation pathway based on the gene content of MAGs. DNT (1) oxidation is  
977 started by a multi compound hydroxylation dioxygenase (dntA). methylnitrocatechol (2) is  
978 oxidized by a monooxygenase (dntB) to a methylquinone (3). This compound reduces to  
979 trihydroxytoluene (4) by 2-hydroxy-5-methylquinone reductase (dntC), and eventually oxidize by  
980 THT oxygenase (dntD) to 2,4-dihydroxy-5-methyl-6-oxo-2,4-hexadienoic acid (5).

981 **Figure 10.** Phylogenetic tree showed proximity of MAGs putative dntD genes to other extradiol  
982 ring cleavage enzymes.

983

984

985

986

**Table 1.** Biodiversity for each soil sample measured by the Simpson index.

| <i>Soil Type</i>      | <i>Sample Name</i> | <i>Simpson Index</i> |
|-----------------------|--------------------|----------------------|
| <i>Pristine</i>       | P1                 | 0.9867               |
|                       | P2                 | 0.9851               |
|                       | P3                 | 0.99                 |
| <i>Tilled + TNT</i>   | T1                 | 0.8868               |
|                       | T2                 | 0.8917               |
|                       | T3                 | 0.7494               |
| <i>Untilled + TNT</i> | U1                 | 0.8954               |
|                       | U2                 | 0.849                |
|                       | U3                 | 0.8667               |

987

988

989

990

991

992

993

994

995

996

997

998

999

1000

1001 **Table 2.** Key genes in TNT and DNT transformation in MAGs for tilled, TNT contaminated soil.  
 1002 \* Initial Transformation genes; \*\* initial Bamberger Rearrangement genes; \*\*\* Intermediate  
 1003 Transformation; \*\*\*\* Intermediate Transformation

| <i>Metagenomic Bins ID</i> | <i>NAD(P)H<br/>nitroreductase*</i> | <i>Carbon monoxide<br/>dehydrogenase**</i> | <i>Hydrogenase**</i> | <i>Family 4-Cresol<br/>dehydrogenase****<br/>(hydroxylating)</i> | <i>dntD***</i> | <i>protocatechuate<br/>decarboxylase****</i> | <i>OxyR****</i> |
|----------------------------|------------------------------------|--------------------------------------------|----------------------|------------------------------------------------------------------|----------------|----------------------------------------------|-----------------|
| <i>concoct.25</i>          | ✓                                  | ✓                                          | ✓                    | ✓                                                                | ✓              | ✓                                            | ✓               |
| <i>Binsaniny.8</i>         | ✓                                  | ✓                                          | x                    | x                                                                | x              | ✓                                            | ✓               |
| <i>Maxbin.002</i>          | ✓                                  | ✓                                          | x                    | x                                                                | ✓              | x                                            | ✓               |
| <i>Maxbin.007</i>          | x                                  | x                                          | x                    | x                                                                | x              | x                                            | ✓               |
| <i>Maxbin.012</i>          | x                                  | x                                          | x                    | x                                                                | x              | ✓                                            | ✓               |
| <i>Maxbin.017</i>          | x                                  | x                                          | x                    | ✓                                                                | x              | x                                            | ✓               |
| <i>Maxbin.019</i>          | x                                  | x                                          | x                    | ✓                                                                | ✓              | x                                            | ✓               |
| <i>Maxbin.025</i>          | x                                  | x                                          | x                    | ✓                                                                | x              | x                                            | ✓               |
| <i>Maxbin.026</i>          | x                                  | x                                          | x                    | ✓                                                                | x              | ✓                                            | ✓               |
| <i>Maxbin.039</i>          | ✓                                  | x                                          | x                    | ✓                                                                | x              | x                                            | ✓               |
| <i>Maxbin.044</i>          | x                                  | x                                          | x                    | x                                                                | x              | x                                            | ✓               |
| <i>Maxbin.046</i>          | ✓                                  | ✓                                          | ✓                    | ✓                                                                | ✓              | x                                            | ✓               |
| <i>Maxbin.048</i>          | x                                  | x                                          | x                    | x                                                                | x              | x                                            | x               |
| <i>Maxbin.057</i>          | ✓                                  | x                                          | x                    | x                                                                | x              | x                                            | x               |
| <i>Maxbin.060</i>          | x                                  | ✓                                          | ✓                    | x                                                                | x              | x                                            | x               |
| <i>Maxbin.062</i>          | x                                  | x                                          | x                    | x                                                                | x              | x                                            | ✓               |
| <i>Maxbin.067</i>          | x                                  | x                                          | x                    | ✓                                                                | x              | x                                            | x               |
| <i>Maxbin.073</i>          | x                                  | x                                          | x                    | x                                                                | x              | x                                            | ✓               |
| <i>Maxbin.075</i>          | ✓                                  | ✓                                          | ✓                    | x                                                                | ✓              | x                                            | x               |
| <i>Maxbin.079</i>          | ✓                                  | x                                          | x                    | x                                                                | x              | x                                            | x               |
| <i>Maxbin.080</i>          | ✓                                  | x                                          | x                    | x                                                                | x              | x                                            | ✓               |
| <i>Meta.bin.12</i>         | x                                  | ✓                                          | ✓                    | ✓                                                                | x              | x                                            | x               |
| <i>Meta.bin.13</i>         | ✓                                  | ✓                                          | x                    | x                                                                | x              | x                                            | x               |
| <i>Meta.bin.17</i>         | ✓                                  | x                                          | x                    | x                                                                | x              | x                                            | x               |
| <i>Meta.bin.18</i>         | ✓                                  | x                                          | x                    | ✓                                                                | ✓              | ✓                                            | ✓               |
| <i>Meta.bin.19</i>         | ✓                                  | ✓                                          | x                    | x                                                                | x              | x                                            | ✓               |
| <i>Meta.bin.21</i>         | ✓                                  | ✓                                          | x                    | ✓                                                                | x              | x                                            | ✓               |
| <i>Meta.bin.3</i>          | ✓                                  | ✓                                          | ✓                    | x                                                                | x              | x                                            | ✓               |
| <i>Meta.bin.39</i>         | x                                  | x                                          | x                    | x                                                                | x              | x                                            | ✓               |
| <i>Meta.bin.45</i>         | x                                  | x                                          | x                    | ✓                                                                | x              | ✓                                            | ✓               |
| <i>Meta.bin.48</i>         | x                                  | ✓                                          | x                    | x                                                                | x              | x                                            | x               |
| <i>Meta.bin.50</i>         | x                                  | x                                          | x                    | x                                                                | x              | x                                            | x               |
| <i>Meta.bin.53</i>         | x                                  | x                                          | x                    | x                                                                | x              | x                                            | x               |
| <i>Meta.bin.6</i>          | ✓                                  | ✓                                          | x                    | x                                                                | x              | x                                            | x               |
| <i>Meta.bin.8</i>          | x                                  | x                                          | x                    | x                                                                | x              | x                                            | x               |

1004

1005 **Table 3.** The *dnt* genes group in DNT transformation in MAGs for tilled, TNT contaminated  
 1006 soil.

| <i>Metagenomic Bins ID</i> | <i>dntAa</i> | <i>dntAb</i> | <i>dntAc</i> | <i>dntAd</i> | <i>dntB</i> | <i>dntC</i> | <i>dntD</i> |
|----------------------------|--------------|--------------|--------------|--------------|-------------|-------------|-------------|
| <i>concoct.25</i>          | ✓            | x            | ✓            | x            | ✓           | ✓           | ✓           |
| <i>Binsaniny.8</i>         | ✓            | ✓            | ✓            | x            | x           | ✓           | x           |
| <i>Maxbin.002</i>          | ✓            | ✓            | x            | x            | ✓           | x           | ✓           |
| <i>Maxbin.007</i>          | x            | x            | x            | x            | x           | x           | x           |
| <i>Maxbin.012</i>          | x            | x            | x            | x            | x           | ✓           | x           |
| <i>Maxbin.017</i>          | x            | x            | x            | ✓            | x           | x           | x           |
| <i>Maxbin.019</i>          | x            | x            | x            | ✓            | ✓           | ✓           | ✓           |
| <i>Maxbin.025</i>          | x            | x            | ✓            | ✓            | x           | x           | x           |
| <i>Maxbin.026</i>          | x            | x            | x            | ✓            | x           | ✓           | x           |
| <i>Maxbin.039</i>          | x            | x            | x            | ✓            | x           | x           | x           |
| <i>Maxbin.044</i>          | x            | x            | x            | x            | x           | x           | x           |
| <i>Maxbin.046</i>          | x            | ✓            | ✓            | ✓            | ✓           | x           | ✓           |
| <i>Maxbin.048</i>          | x            | x            | x            | x            | x           | x           | x           |
| <i>Maxbin.057</i>          | x            | x            | x            | x            | x           | x           | x           |
| <i>Maxbin.060</i>          | x            | ✓            | ✓            | x            | x           | x           | x           |
| <i>Maxbin.062</i>          | x            | x            | x            | x            | x           | x           | x           |
| <i>Maxbin.067</i>          | x            | x            | x            | ✓            | x           | x           | x           |
| <i>Maxbin.073</i>          | x            | x            | x            | x            | x           | x           | x           |
| <i>Maxbin.075</i>          | ✓            | ✓            | ✓            | ✓            | ✓           | ✓           | ✓           |
| <i>Maxbin.079</i>          | ✓            | x            | x            | x            | x           | x           | x           |
| <i>Maxbin.080</i>          | ✓            | x            | x            | x            | x           | x           | x           |
| <i>Meta.bin.12</i>         | x            | ✓            | ✓            | ✓            | x           | x           | x           |
| <i>Meta.bin.13</i>         | ✓            | ✓            | x            | x            | x           | x           | x           |
| <i>Meta.bin.17</i>         | ✓            | x            | x            | x            | x           | x           | x           |
| <i>Meta.bin.18</i>         | ✓            | x            | x            | ✓            | ✓           | ✓           | ✓           |
| <i>Meta.bin.19</i>         | ✓            | ✓            | x            | x            | x           | x           | x           |
| <i>Meta.bin.21</i>         | ✓            | ✓            | x            | ✓            | x           | x           | x           |
| <i>Meta.bin.3</i>          | ✓            | ✓            | ✓            | x            | x           | x           | x           |
| <i>Meta.bin.39</i>         | x            | x            | x            | x            | x           | x           | x           |
| <i>Meta.bin.45</i>         | x            | x            | x            | ✓            | x           | ✓           | x           |
| <i>Meta.bin.48</i>         | x            | ✓            | x            | x            | x           | x           | x           |
| <i>Meta.bin.50</i>         | x            | x            | x            | x            | x           | x           | x           |
| <i>Meta.bin.53</i>         | x            | x            | x            | x            | x           | x           | x           |
| <i>Meta.bin.6</i>          | ✓            | ✓            | x            | x            | x           | x           | x           |
| <i>Meta.bin.8</i>          | x            | x            | x            | x            | x           | x           | x           |

1007

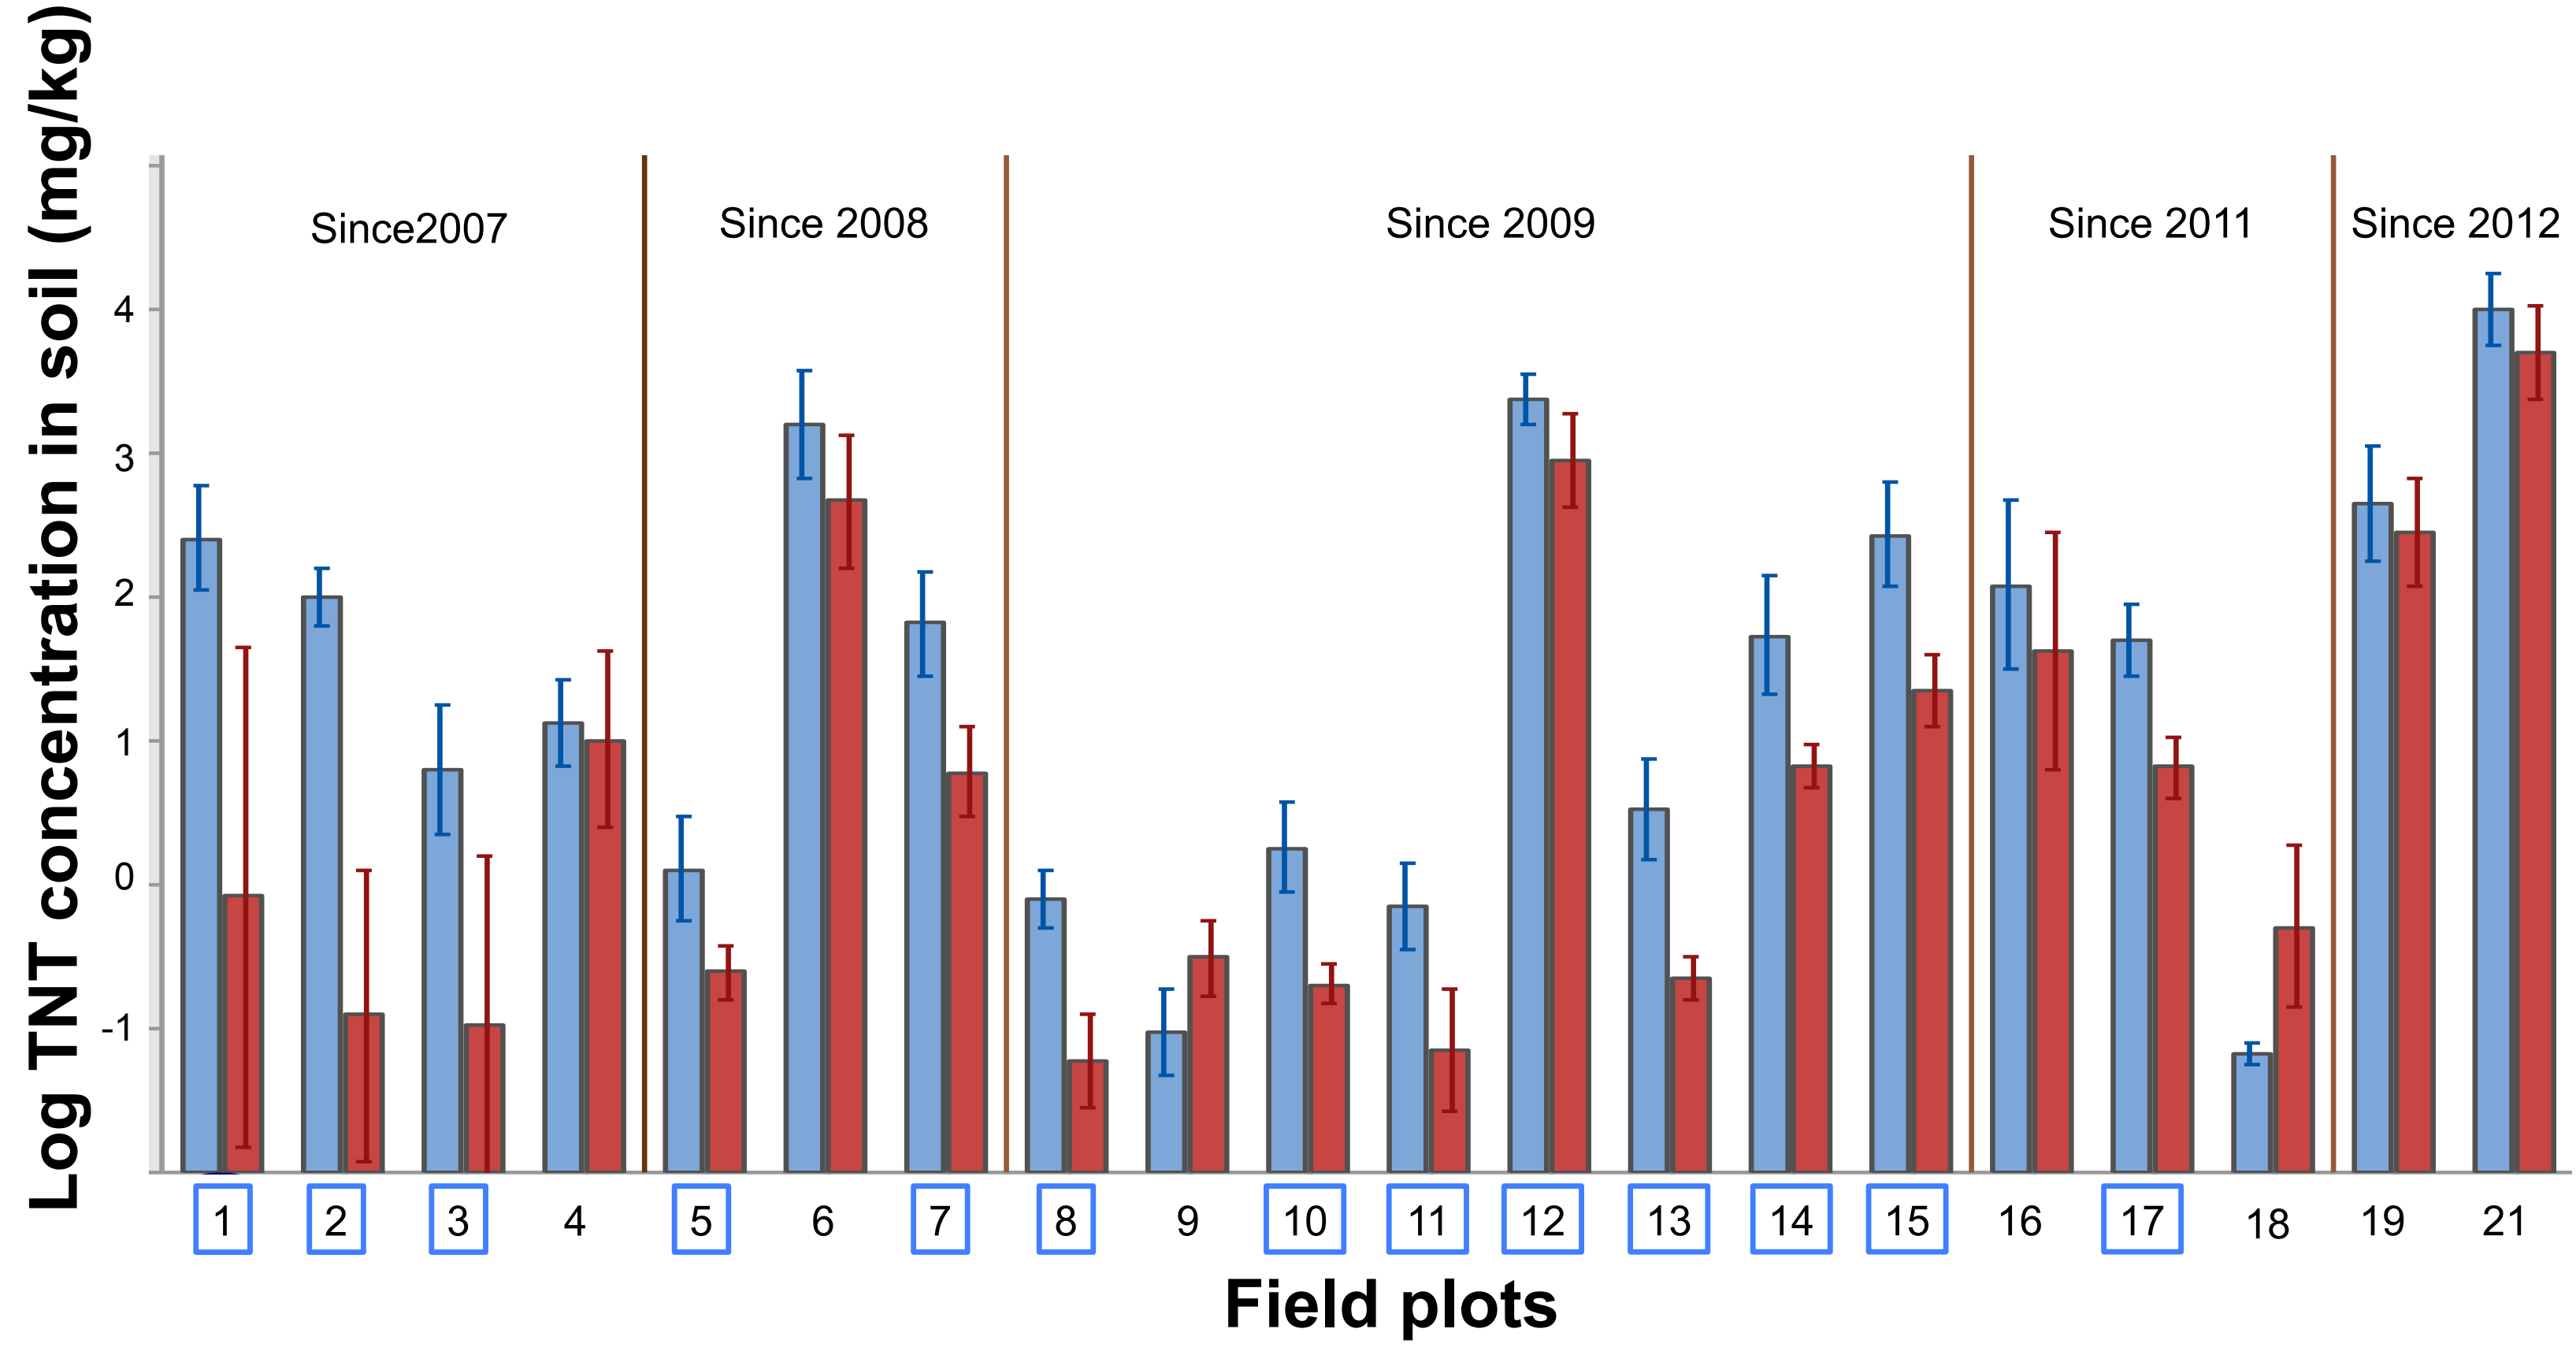

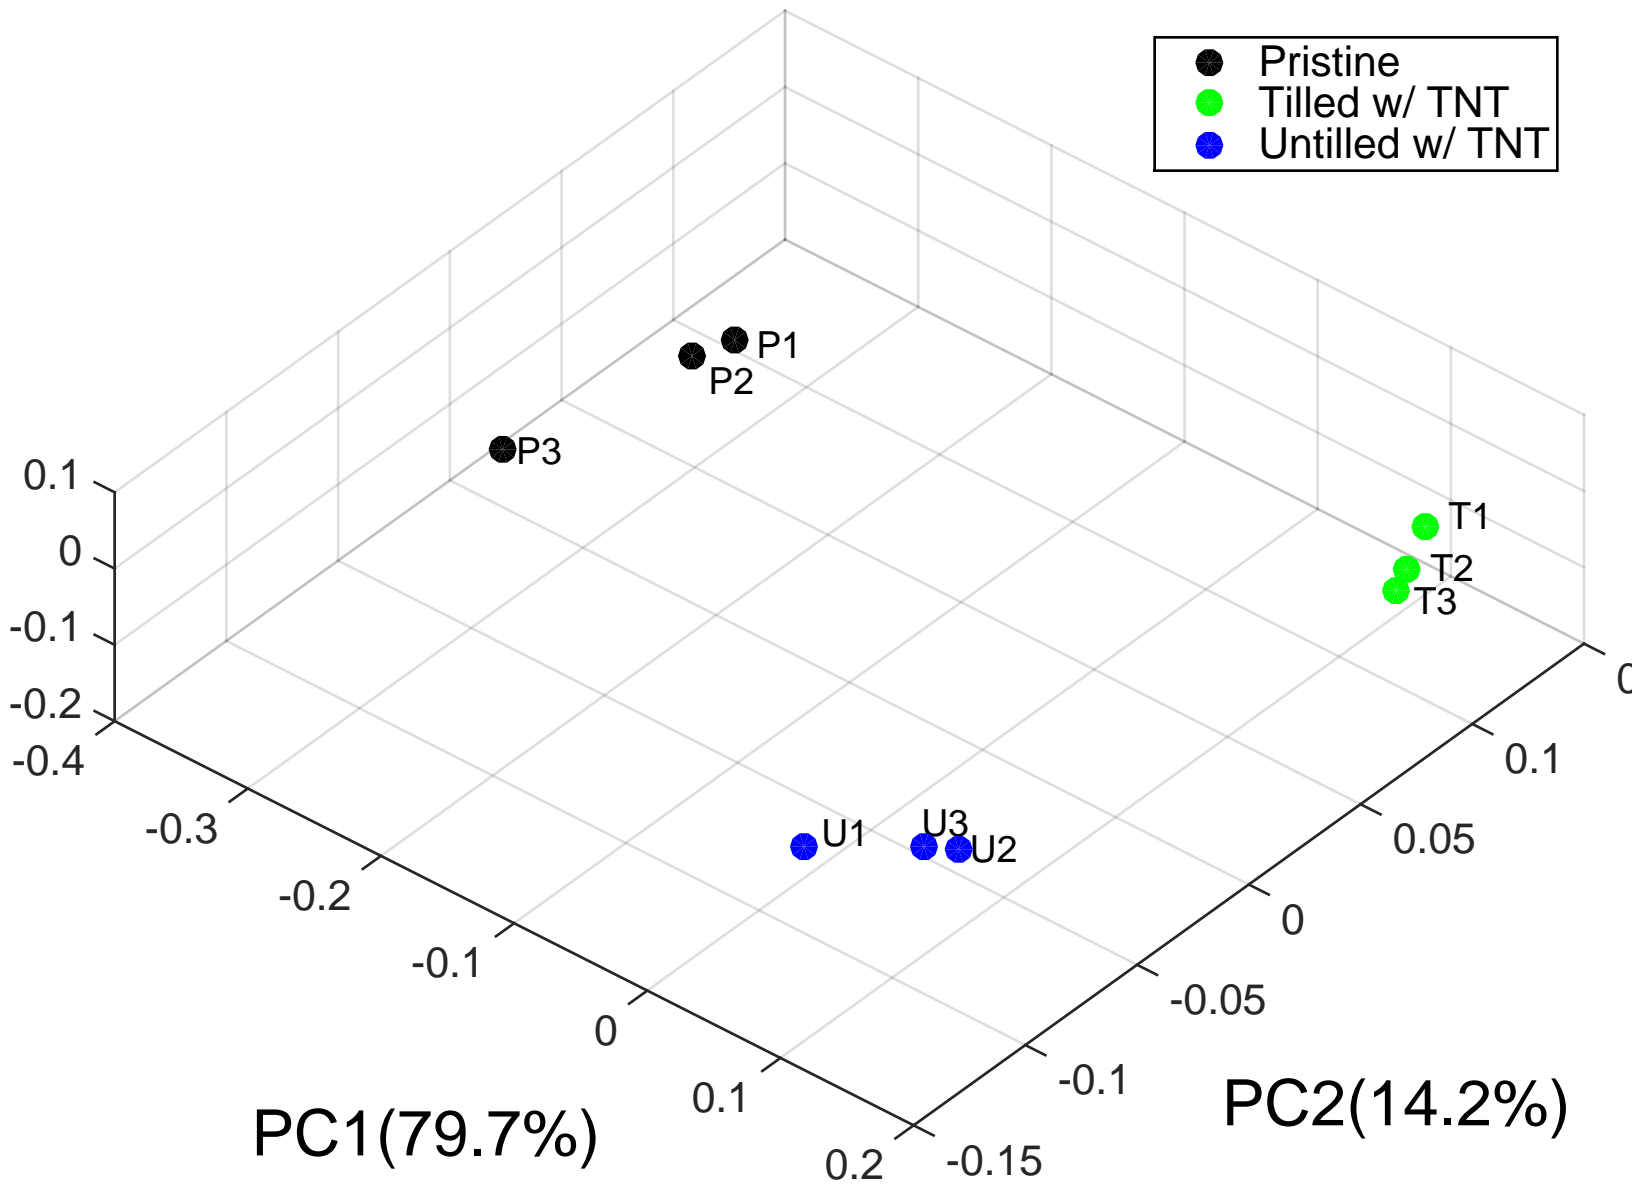



### Pristine

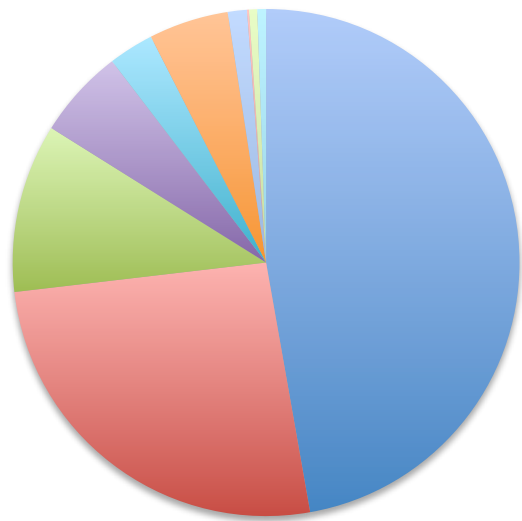

### Tilled w/ TNT

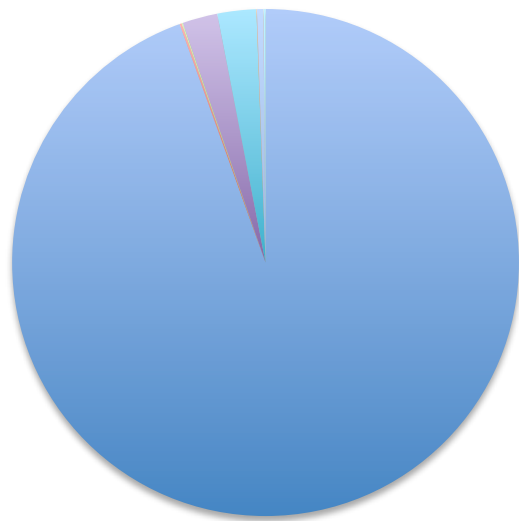

### Untilled w/ TNT

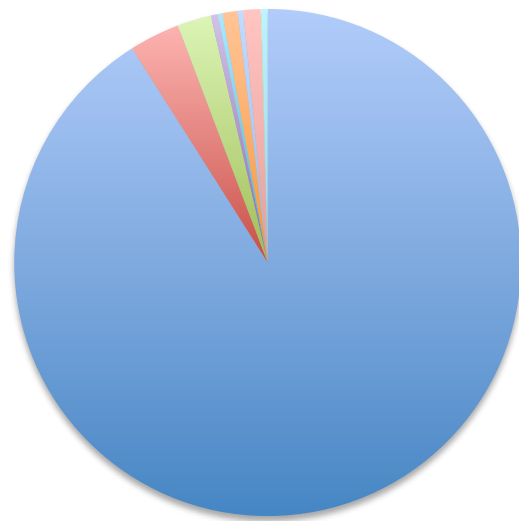

- Proteobacteria
- Acidobacteria
- Verrucomicrobia
- Actinobacteria
- Bacteroidetes
- Planctomycetes
- Firmicutes
- Nitrospirae
- Elusimicrobia
- SBR1093
- Others

**Pristine**

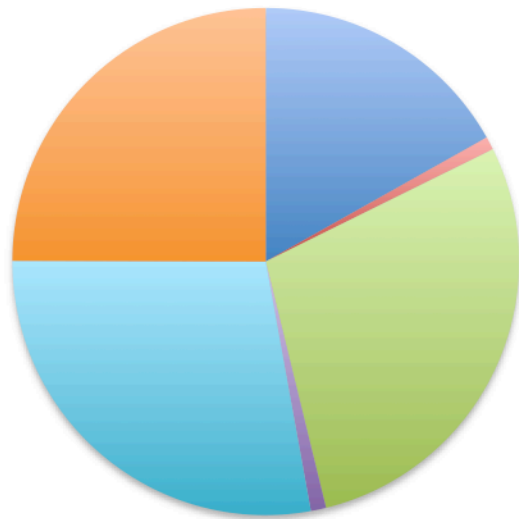

**Tilled w/ TNT**

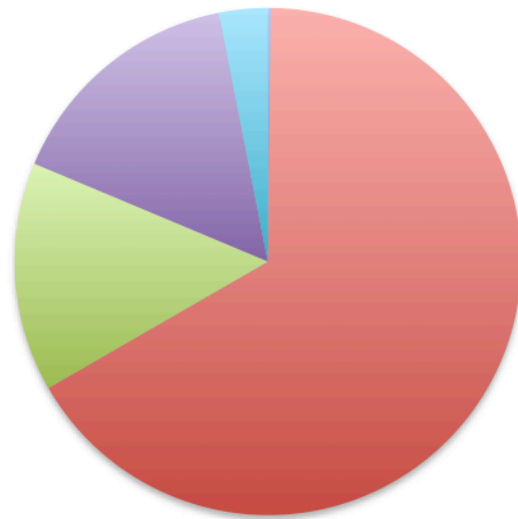

**Untilled w/ TNT**

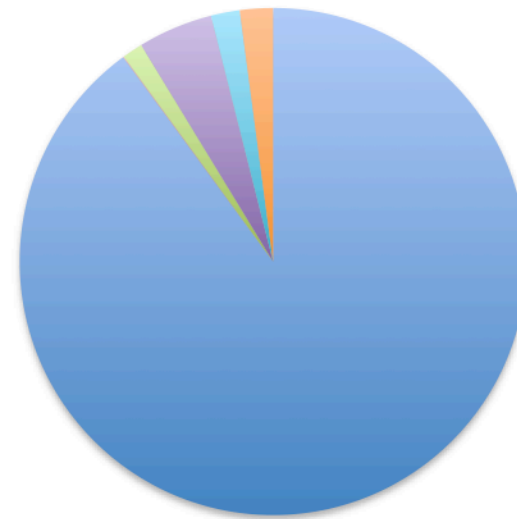

- Burkholderiaceae
- Alcaligenaceae
- Comamonadaceae
- Pseudomonadaceae
- Xanthomonadaceae
- [Chthoniobacteraceae]

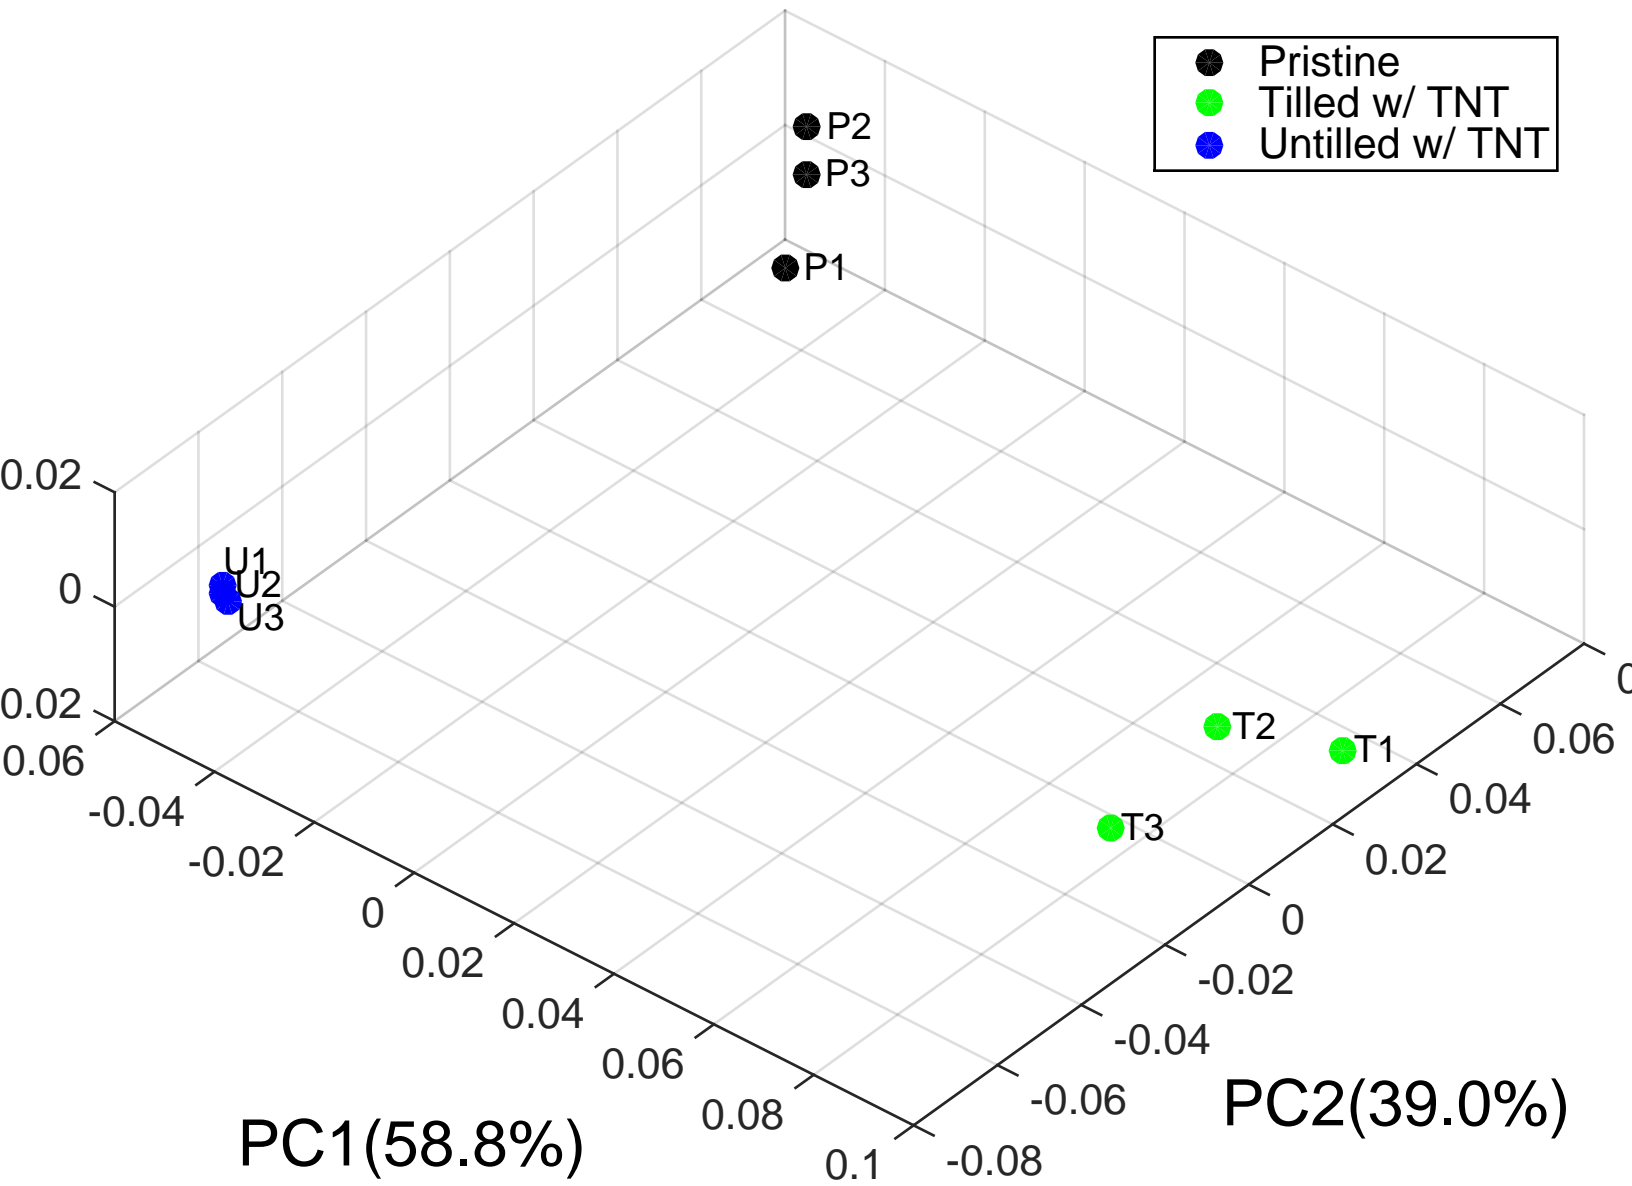

# Phylogenetic tree of Alcaligenaceae 97% OTUs

## UniqueID/Family/Genus/Species

## $-\log_{10}(\text{relative abundance averaged over 3 samples})$

bioRxiv preprint doi: <https://doi.org/10.1101/2020.12.12.420737>; this version posted December 14, 2020. The copyright holder for this preprint (which was not certified by peer review) is the author/funder. All rights reserved. No reuse allowed without permission.

|                                                    | Pristine | Tilled w/ TNT | Untilled w/ TNT |
|----------------------------------------------------|----------|---------------|-----------------|
| 788519/NA/NA/NA                                    | Inf      | Inf           | 4.875           |
| 112764/Alcaligenaceae/NA/NA                        | Inf      | 5.641         | Inf             |
| 850190/Alcaligenaceae/NA/NA                        | 4.474    | 5.720         | 4.760           |
| 26755/Alcaligenaceae/NA/NA                         | Inf      | 3.733         | Inf             |
| 4427534/Alcaligenaceae/NA/NA                       | 4.310    | 1.557         | 4.785           |
| 512238/Alcaligenaceae/NA/NA                        | Inf      | 5.942         | Inf             |
| 157497/Alcaligenaceae/Tetrathlobacter/kashmirensis | Inf      | 4.658         | Inf             |
| 4298637/Alcaligenaceae/NA/NA                       | 5.202    | 5.942         | 6.181           |
| 6825/Alcaligenaceae/NA/NA                          | Inf      | 3.095         | 5.880           |
| 4418106/Alcaligenaceae/NA/NA                       | Inf      | 4.929         | Inf             |
| 562181/Alcaligenaceae/NA/NA                        | Inf      | 6.243         | Inf             |
| 842765/Alcaligenaceae/NA/NA                        | Inf      | Inf           | 6.181           |
| 4295902/Alcaligenaceae/NA/NA                       | Inf      | 3.580         | 6.181           |
| 818002/Alcaligenaceae/Denitrobacter/NA             | 4.794    | 3.815         | 4.701           |
| 509480/Alcaligenaceae/NA/NA                        | Inf      | Inf           | 6.181           |
| 624474/Alcaligenaceae/NA/NA                        | Inf      | 5.626         | Inf             |
| 765433/Alcaligenaceae/NA/NA                        | Inf      | 5.305         | 4.785           |
| 266661/Alcaligenaceae/NA/NA                        | Inf      | 5.626         | Inf             |
| 840949/Alcaligenaceae/NA/NA                        | Inf      | 5.063         | Inf             |
| 4367588/Alcaligenaceae/NA/NA                       | Inf      | 3.773         | Inf             |
| 4440096/Alcaligenaceae/NA/NA                       | Inf      | 6.243         | Inf             |
| 758418/Alcaligenaceae/NA/NA                        | Inf      | 4.590         | Inf             |
| 670777/Alcaligenaceae/NA/NA                        | 4.322    | 2.252         | 4.689           |
| 25051/Alcaligenaceae/NA/NA                         | Inf      | 5.766         | Inf             |
| 1811594/Alcaligenaceae/NA/NA                       | 4.651    | 2.174         | 5.370           |
| 839270/Alcaligenaceae/NA/NA                        | Inf      | Inf           | 5.752           |
| 692158/Alcaligenaceae/NA/NA                        | Inf      | 4.783         | Inf             |
| 727056/Alcaligenaceae/NA/NA                        | Inf      | 3.313         | 6.054           |
| 619799/Alcaligenaceae/NA/NA                        | Inf      | 4.771         | Inf             |
| 95941/Alcaligenaceae/NA/NA                         | Inf      | 5.305         | Inf             |
| 309648/Alcaligenaceae/NA/NA                        | Inf      | 4.552         | Inf             |
| 4415319/Alcaligenaceae/NA/NA                       | Inf      | 2.762         | 5.812           |
| 820379/Alcaligenaceae/NA/NA                        | Inf      | 6.243         | Inf             |
| 725402/Alcaligenaceae/Pigmentiphaga/NA             | Inf      | 3.993         | 5.704           |
| 149330/Alcaligenaceae/Pigmentiphaga/NA             | Inf      | 3.746         | Inf             |
| 108905/Alcaligenaceae/Pigmentiphaga/NA             | Inf      | 5.766         | Inf             |
| 673343/Alcaligenaceae/NA/NA                        | Inf      | 3.488         | 5.812           |
| 334110/Alcaligenaceae/NA/NA                        | Inf      | 3.743         | Inf             |
| 565246/Alcaligenaceae/NA/NA                        | 2.698    | 0.453         | 4.002           |
| 1147718/Alcaligenaceae/NA/NA                       | Inf      | 3.112         | 5.752           |
| 37958/Alcaligenaceae/NA/NA                         | Inf      | 3.971         | 5.704           |
| 2796295/Alcaligenaceae/NA/NA                       | Inf      | 3.049         | 5.880           |
| 1126544/Alcaligenaceae/NA/NA                       | 4.336    | 2.610         | 4.665           |
| 346019/Alcaligenaceae/NA/NA                        | Inf      | 5.322         | 6.181           |
| 4483058/Alcaligenaceae/NA/NA                       | Inf      | 4.713         | 6.181           |
| 68617/Alcaligenaceae/Achromobacter/NA              | 3.665    | 1.237         | 4.410           |
| 142658/Alcaligenaceae/Achromobacter/NA             | Inf      | 4.358         | Inf             |
| 382348/Alcaligenaceae/Achromobacter/NA             | Inf      | 4.266         | Inf             |
| 332634/Alcaligenaceae/Achromobacter/NA             | Inf      | 4.655         | Inf             |
| 68622/Alcaligenaceae/Achromobacter/NA              | 4.279    | 1.805         | 5.112           |
| 135965/Alcaligenaceae/Achromobacter/NA             | 3.890    | 1.874         | 4.825           |
| 4451045/Alcaligenaceae/Achromobacter/NA            | Inf      | 3.482         | 6.054           |
| 228065/Alcaligenaceae/Achromobacter/NA             | Inf      | 2.791         | 5.657           |
| 1060234/Alcaligenaceae/Achromobacter/NA            | 4.757    | 2.326         | 5.511           |
| 234866/Alcaligenaceae/Achromobacter/NA             | Inf      | 5.720         | Inf             |
| 234044/Alcaligenaceae/Achromobacter/NA             | Inf      | 4.063         | Inf             |
| 268968/Alcaligenaceae/Achromobacter/NA             | 4.058    | 1.455         | 4.251           |
| 423327/Alcaligenaceae/Achromobacter/NA             | 4.221    | 1.779         | 4.504           |

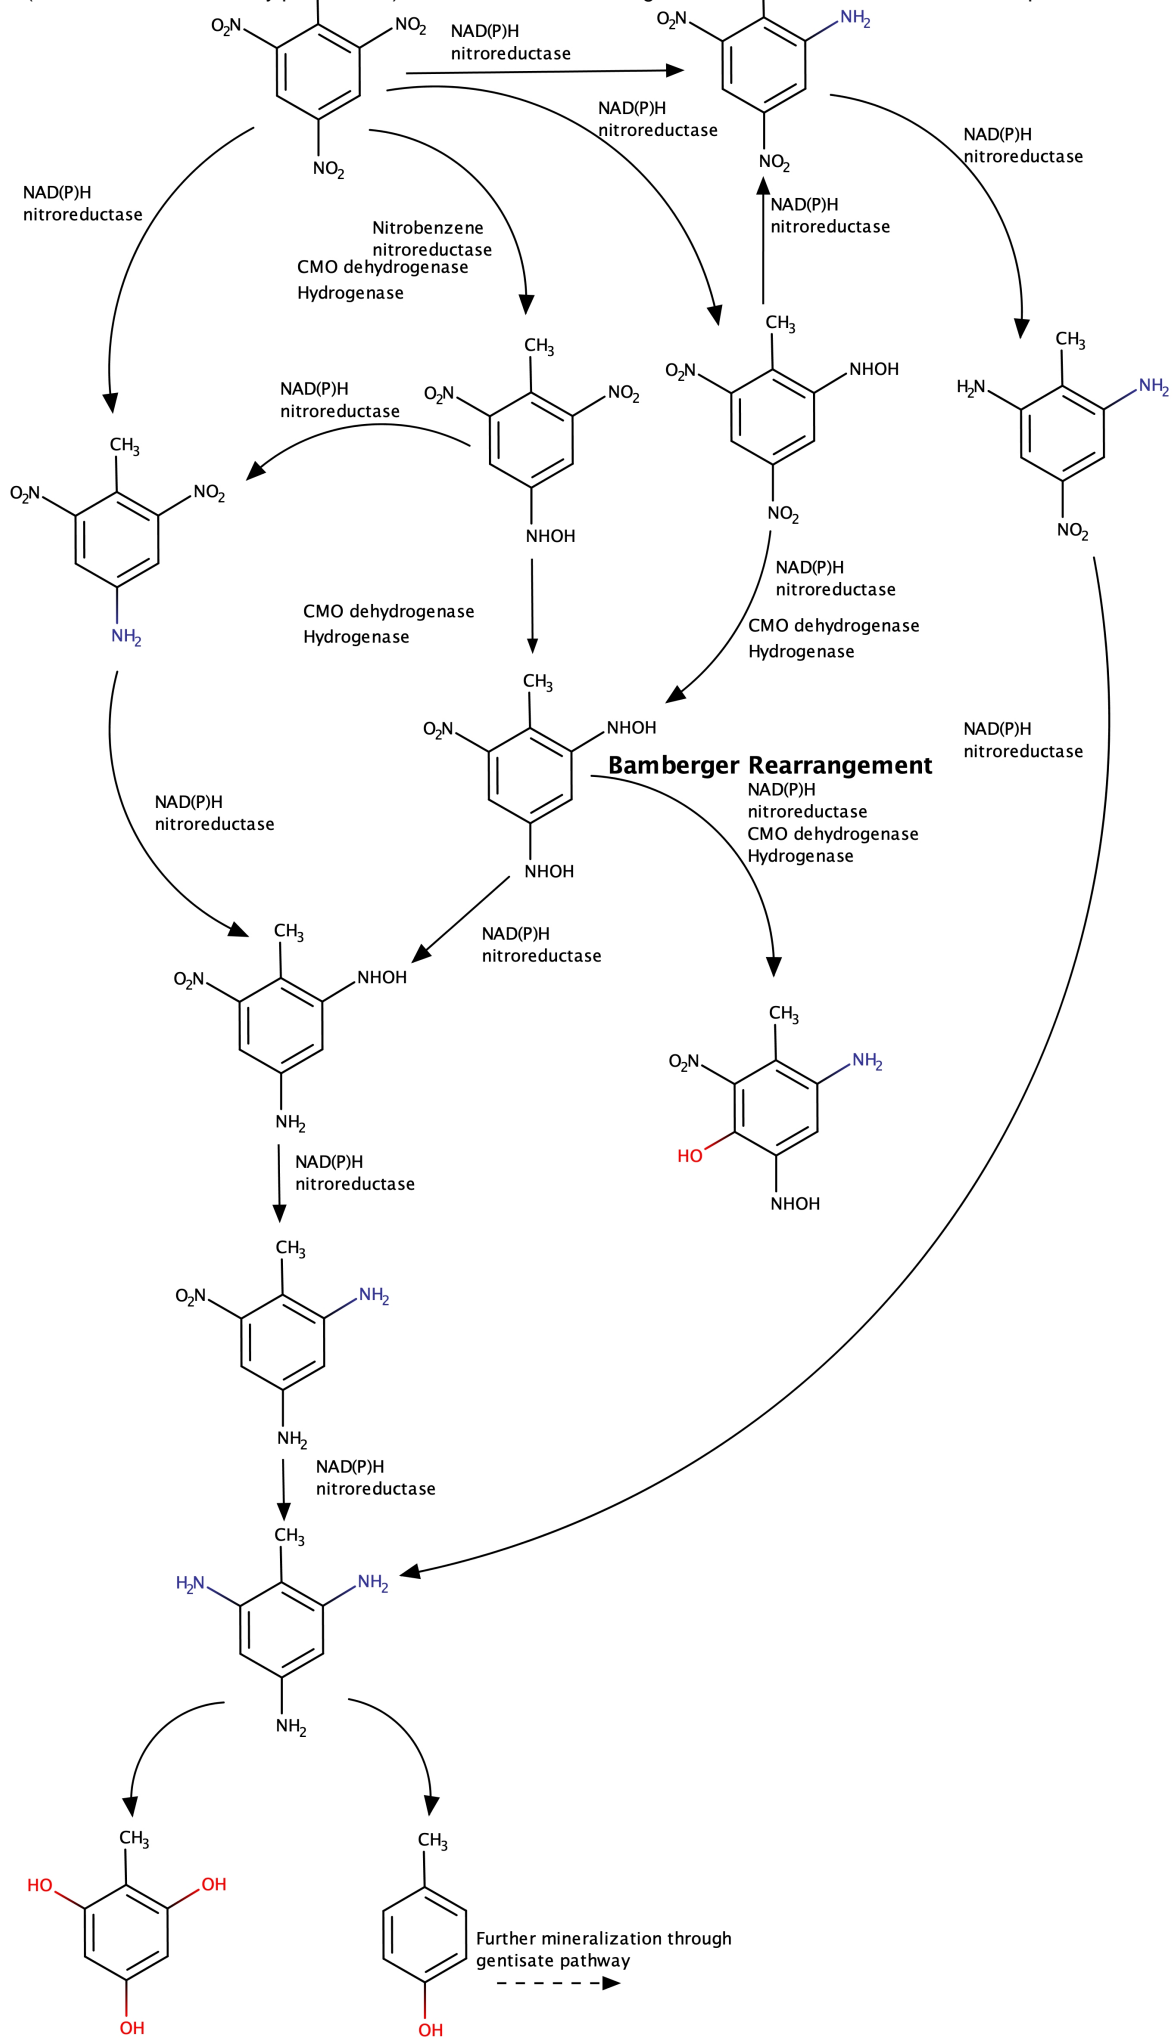

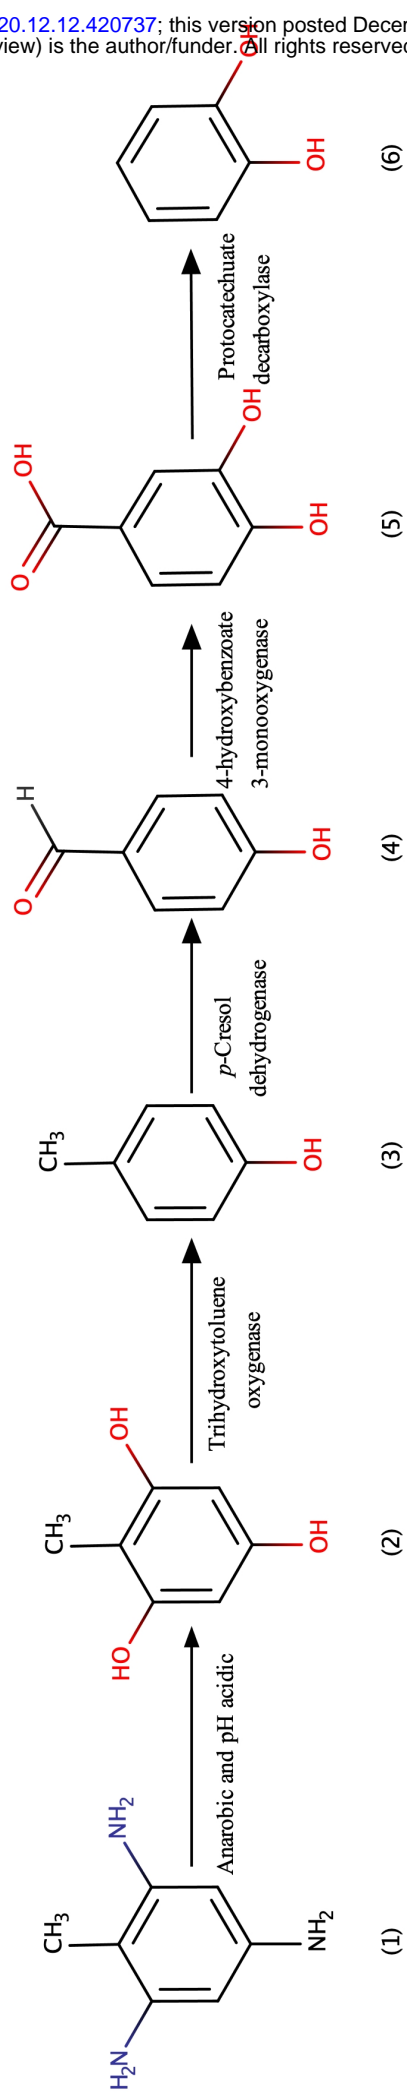



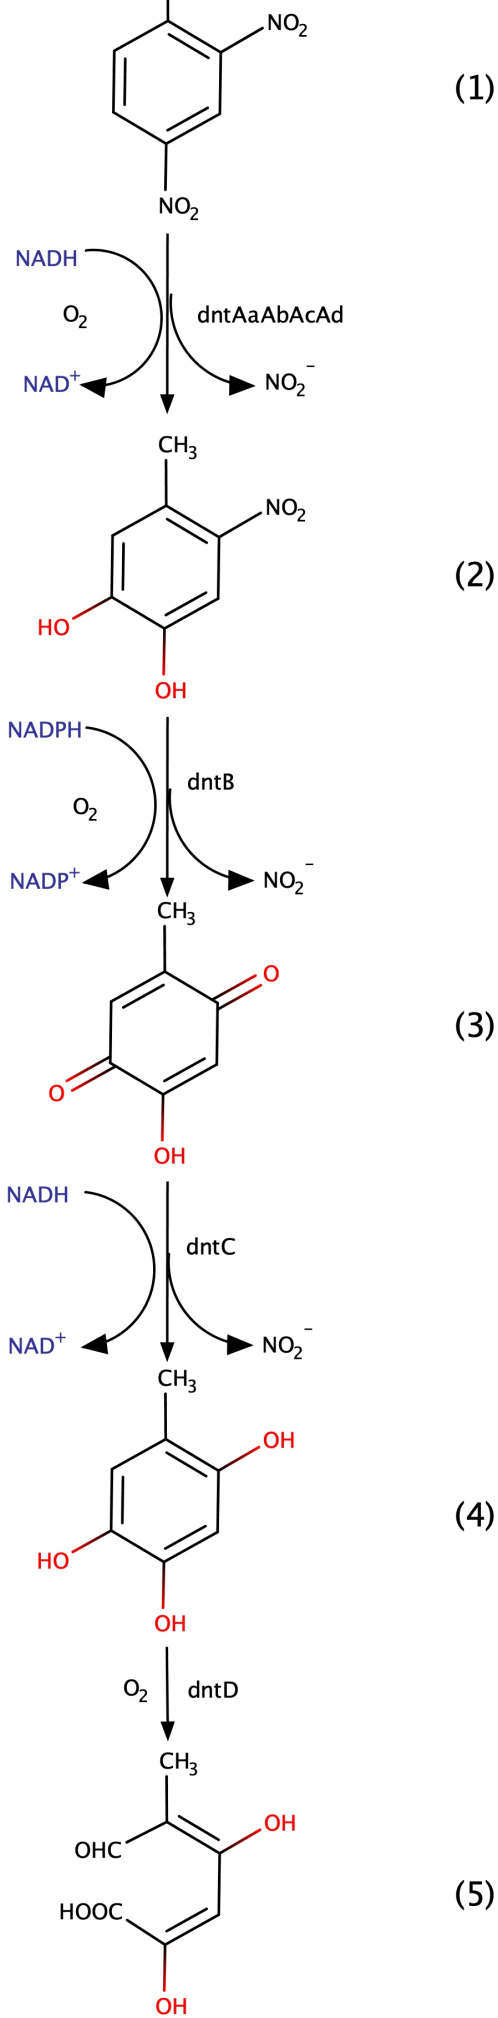

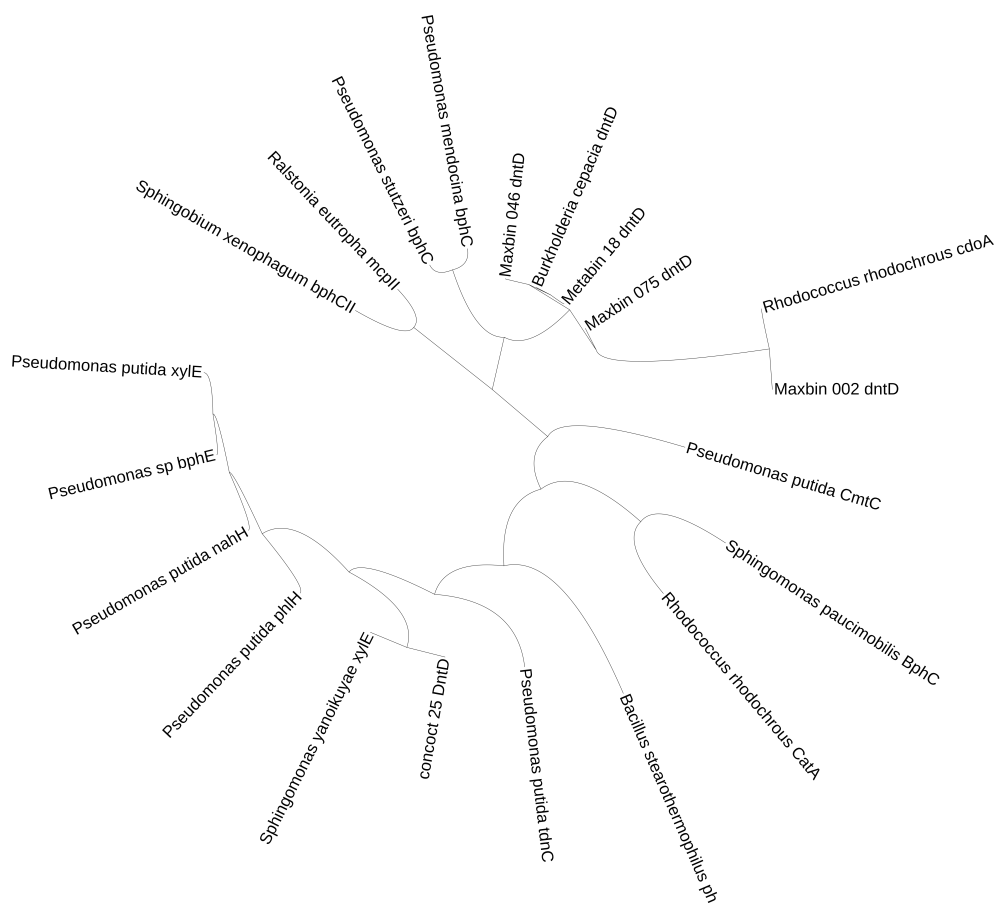

Source: http://biorxiv.org/content/10.1101/2020.12.12.420737v1.full.pdf
